# Supplementary material for: Effects of a school-based prevention programme on smoking in early adolescence: a 6-month follow-up of the ‘Eigenständig werden’ cluster randomised trial
Source: PubMed Central journal article supplement — BMJ Open. 2014 Jan 18;4(1):e004422. doi: 10.1136/bmjopen-2013-004422 (PMC3902526; doi:10.1136/bmjopen-2013-004422), 2014-01-18
Supplement: bmjopen-2013-004422.draft_revisions.pdf [file bmjopen-2013-004422.draft_revisions.pdf]

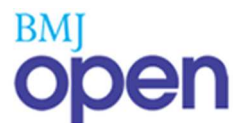

**Effects of a School-Based Prevention Program on Smoking:  
Six-Month Follow-up of the 'Eigenständig werden' Cluster  
Randomized Trial**

|                                 |                                                                                                                                                                                                                                                            |
|---------------------------------|------------------------------------------------------------------------------------------------------------------------------------------------------------------------------------------------------------------------------------------------------------|
| Journal:                        | <i>BMJ Open</i>                                                                                                                                                                                                                                            |
| Manuscript ID:                  | bmjopen-2013-004422                                                                                                                                                                                                                                        |
| Article Type:                   | Research                                                                                                                                                                                                                                                   |
| Date Submitted by the Author:   | 07-Nov-2013                                                                                                                                                                                                                                                |
| Complete List of Authors:       | Isensee, Barbara; Institute for Therapy and Health Research, IFT-Nord, Hansen, Julia; Institute for Therapy and Health Research, Maruska, Karin; Institute for Therapy and Health Research, Hanewinkel, Reiner; Institute for Therapy and Health Research, |
| <b>Primary Subject Heading</b>: | Public health                                                                                                                                                                                                                                              |
| Secondary Subject Heading:      | Addiction, Smoking and tobacco                                                                                                                                                                                                                             |
| Keywords:                       | Substance misuse < PSYCHIATRY, PUBLIC HEALTH, school based prevention, smoking, cluster randomized controlled trial, efficacy                                                                                                                              |
|                                 |                                                                                                                                                                                                                                                            |

SCHOLARONE™  
Manuscripts

1  
2  
3 Effects of a School-Based Prevention Program on Smoking: Six-Month Follow-up of the  
4 'Eigenständig werden' Cluster Randomized Trial  
5  
6

7 Barbara Isensee, Julia Hansen, Karin Maruska, Reiner Hanewinkel  
8  
9 Institute for Therapy and Health Research (IFT-Nord)  
10 Harmsstr. 2  
11  
12 24114 Kiel, Germany  
13

14  
15 Corresponding Author:

16 Barbara Isensee

17  
18 Phone: +49 (0)431 5702930

19 Fax: +49 (0)431 5702929

20  
21 Email: isensee@ift-nord  
22  
23

24  
25  
26 Key words: smoking; school-based prevention; cluster randomized controlled trial; efficacy  
27

28  
29 Word count main text: 3,770  
30  
31  
32  
33  
34  
35  
36  
37  
38  
39  
40  
41  
42  
43  
44  
45  
46  
47  
48  
49  
50  
51  
52  
53  
54  
55  
56  
57  
58  
59  
60

## ABSTRACT

**Objectives:** To test the effects of a school-based prevention program on students' smoking related behavior, attitudes and knowledge six months after program implementation has ended.

**Design:** Two-arm prospective cluster randomized controlled trial with a follow-up survey six months after end of program implementation.

**Setting:** Forty-five public secondary schools from four federal states in Germany (Bremen, Hesse, North Rhine-Westphalia, Schleswig-Holstein).

**Participants:** A total of 3,444 students from 172 classes at baseline with a mean age of 10.37 years (SD=0.59) and 47.9% girls. Analysis sample with follow-up up data merged to baseline data comprises 2,513 data sets (73.0%).

**Intervention:** "Eigenständig werden 5+6", a school-based prevention program for grade five and six to enhance substance specific and general life skills, consisting of 14 units (à 90 minutes) and two workshops (4 resp. 6 hours) being taught over a time period of two years by trained teachers.

**Outcome measures:** Lifetime and current smoking, incidence of smoking in baseline never smokers, smoking related knowledge, attitudes, perceived norms of smoking, self-efficacy to refuse cigarette offers were assessed in students.

**Results:** Six months after end of program implementation, students of intervention classes showed significantly lower rates for lifetime smoking (adjusted odds ratio [OR]=0.63; 95% confidence interval [CI]=[0.41; 0.96]; p=0.026) and incidence of smoking (adjusted OR=0.66; 95% CI=[0.43; 1.00]; p=0.047), a higher increase of smoking related knowledge (adjusted  $\beta$ =9.38; 95% CI=[6.73; 12.04]; p<0.001) and a greater change in attitudes towards a more critical perception of risks and disadvantages of smoking (adjusted  $\beta$ =0.10; 95% CI=[0.03; 0.16]; p=0.002). No group differences were found for current smoking, perceived norms of smoking and self-efficacy to refuse cigarette offers.

**Conclusions:** Participation in the school-based prevention program "Eigenständig werden 5+6" may have small effects on smoking behavior and attitudes and a moderate effect on smoking related knowledge.

**Trial registration:** Current Controlled Trials ISRCTN99442407

Word count abstract: 299 words

## ARTICLE SUMMARY

### Article focus

- School-based prevention programs show inconsistent results concerning efficacy and most of evaluation studies were conducted in the US.
- This study investigates the effects of a prevention program implemented in grade 5 and 6 in German schools on different outcomes six months after end of program using rigorous evaluation methodology.

### Key messages

- Program participation seems to reduce prevalence and incidence of lifetime smoking, to increase smoking related knowledge, and to influence attitudes towards a more critical perception of smoking.

### Strengths and limitations of this study

- Findings were retrieved from a cluster randomized controlled trial with a well-powered sample and under usage of sophisticated statistical methods controlling for confounders and taking clustering of data into account.
- Drop out, reliance on self-reports and lack of control for treatment integrity may be limiting factors to this study.

## BACKGROUND

Smoking remains to be the single greatest preventable cause of mortality worldwide, being a major risk factor for a number of life-threatening diseases, including various cancers, cardiovascular diseases and lung diseases.<sup>1</sup> Though reductions in smoking rates in adolescents have been documented for many Western countries including Germany<sup>2</sup> over the last decade, smoking prevention is still a main issue for public health.

School programs are often one of the first approaches mentioned in efforts to denormalize tobacco use and to raise awareness of tobacco's hazardous nature. Prominent approaches to prevent smoking in students are the development and improvement of general life skills, as well as the fostering of skills for resisting social influence and substance-specific skills in adolescence. General life skills are considered to empower adolescents in challenging situations and to help them to master life as competent as possible.<sup>3</sup> By enhancing these skills, it is assumed to prevent substance use and abuse, since substance use is considered as a dysfunctional strategy to cope with every day challenges and developmental tasks in adolescence. In line with the social influence approach,<sup>4</sup> smoking is conceptualized as a result of influences emerging from the adolescent's environment like peers, family, or media by normative processes and/or overt cigarette offers. Therefore, correction of inaccurate norms is one important component of these programs to adjust the often overestimated prevalence of smoking in adolescence towards more conservative and realistic norms.<sup>5</sup> Skill training following these approaches is considered to 'inoculate' students against influences encouraging them to smoke, to help them resist temptations from peers to smoke and to correct normative expectations towards smoking.

For more than 40 years prevention programs have been implemented and evaluated within the school setting. However, empirical evidence of the efficacy of these approaches is not yet uniquely convincing.<sup>6-11</sup> A recent Cochrane review on the effects of school-based smoking prevention trials<sup>12</sup> selected randomized controlled trials where students, classes, schools, or school districts were randomized to intervention arm(s) versus a control group, and followed-up for at least six months. One hundred and thirty-four studies involving 428,293 participants met the inclusion criteria of the review which revealed an overall significant intervention effect on the onset of smoking at longest follow-up, while there was no overall effect at follow-ups at one year or less. When analyzing intervention effects not only on smoking behavior, but also on further outcomes addressed directly or indirectly by school-based interventions like attitudes towards smoking, resistance skills or smoking related knowledge, findings might be condensed into a more or less consistent pattern with medium effects being found for knowledge and, if any, small effects for attitudes, skills and use.<sup>13-15</sup>

1  
2  
3 Among altogether 37 trials on smoking prevention strategies from the time period 2001 to  
4 2006 which were included in a Health Technology Assessment, only one study originated  
5 from Germany.<sup>16</sup> The Cochrane Review<sup>12</sup> which covers publications until 2012 included  
6 another five studies from Germany, three of them were trials being published until 2000, and  
7 two trials being published after 2006 (one of these was a multi-center study with one out of  
8 seven centers being located in Germany). Most of these studies had some methodological  
9 shortcomings like not adjusting for clustering of data which results from the specific  
10 characteristics of the setting with delivery of the intervention to complete classes, and  
11 schools or classes instead of individuals being the unit of randomization. Therefore, a lack of  
12 rigorous evaluation trials on smoking prevention programs can be inferred especially for  
13 Germany.  
14  
15  
16  
17  
18  
19

20  
21 The present study aims to contribute to overcome shortcomings in evidence for efficacy of  
22 school-based smoking prevention by presenting results of cluster randomized trial from  
23 Germany. We report findings on 6-month follow-up effects of a school-based curriculum  
24 named “Eigenständig werden 5+6” (“Becoming independent 5+6”) for students in grade five  
25 and six. The overall aim of “Eigenständig werden 5+6” is the prevention of substance use  
26 and abuse by increasing substance specific skills and general life skills of students. Findings  
27 presented herein refer to effects of program participation on smoking related knowledge,  
28 attitudes towards smoking, perceived norms of smoking, self-efficacy to resist cigarette offers  
29 and actual smoking behavior six months after end of program implementation.  
30  
31  
32  
33  
34  
35  
36

## 37 **METHODS**

### 38 **Intervention**

39  
40 “Eigenständig werden 5+6” is a school-based prevention program for students in grade five  
41 and six which takes quality criteria of effective prevention programs into account.<sup>7;8;17;18</sup>

42  
43 Based on the life skills approach and on the social influence model, “Eigenständig werden  
44 5+6” aims primarily at the prevention of substance use (i.e. tobacco smoking and drinking  
45 alcohol) by increasing general life skills as well as substance specific skills (i.e. coping with  
46 emotions, stress, problems, pressures to smoke and drink alcohol, increase of refusal skills  
47 and decrease of susceptibility to pro-smoking and pro-alcohol social influences).  
48  
49  
50  
51

52 The program delivers the contents (life skills, students’ ability to work in a group, substance  
53 specific skills) in 14 units (most of them lasting 90 minutes) and in two workshops (four to six  
54 class hours) that are evenly distributed over the grades five and six. Workshops include  
55 several activities about substance use such as smoking cigarettes and alcohol misuse. All  
56  
57  
58  
59  
60

1  
2  
3 components are realized by trained teachers within daily school-routine. Further details on  
4 the program have been described elsewhere.<sup>19</sup>  
5  
6

### 7 8 **Design**

9 A five-wave cluster randomized-controlled trial with two arms (intervention and control  
10 condition) is being conducted in four German federal states (Bremen, Hesse, North Rhine-  
11 Westphalia and Schleswig-Holstein) to evaluate effects of “Eigenständig werden 5+6”. The  
12 randomization occurred at school level to avoid information exchange between conditions in  
13 the school. For randomization, schools were stratified according to the following criteria: (1)  
14 study region, (2) type of school, (3) number of fifth grade classes per school. According to  
15 these strata, schools were randomly assigned to the two arms of the study with a 50 per cent  
16 chance of being allocated to either group by using coin toss method. Intervention group took  
17 part in “Eigenständig werden 5+6” and is compared to control group receiving education as  
18 usual. Assessments took place prior to the intervention in October/November 2010, post-  
19 tests were realized in June/July 2011 and June/July 2012, a 6-month follow-up was being  
20 conducted in December 2012 and a 15-month follow-up will take place in September/October  
21 2013. For further details, see Hansen et al.<sup>19</sup>  
22  
23  
24  
25  
26  
27  
28

### 29 30 **Study Sample**

31 Complete lists of all secondary schools of selected regions were obtained from the Ministries  
32 of Education of each federal state. An overall of 450 secondary schools in the study regions  
33 were invited to participate in the study, of which 323 (71.5%) did neither express approval or  
34 disapproval (Figure 1). The decision to participate in the study was expressed by 48 schools  
35 (11%) with 191 classes and 4,772 students. Of these 48 schools agreeing to participate, 26  
36 schools with 97 classes and 2,437 students were allocated to intervention group whereas 22  
37 schools with 94 classes and 2,335 students were assigned to control condition. After  
38 randomization, three schools of intervention group withdrew their consent as well as four  
39 teachers of intervention classes refused to take part.  
40  
41  
42  
43  
44  
45

46  
47 Consequently, baseline data comprises 45 schools, 172 classes and 3,444 students with a  
48 mean age of 10.37 years (SD=0.59), 47.9% girls, with 1,685 students in 81 classes in  
49 intervention and 1,759 students in 91 classes in control condition. In respect to different  
50 outcome and covariate characteristics, intervention and control students were extensively  
51 comparable with the exception of a higher proportion of students of Gymnasiums in control  
52 condition (for sample size determination and detailed baseline sample description see<sup>19</sup>).  
53  
54

55 Data presented herein refer to baseline (October 2010) and 6-month follow-up survey  
56 (December 2012). It was possible to merge follow-up data of 1,255 students in intervention  
57  
58  
59  
60

1  
2  
3 arm and 1,438 students in control arm (total N=2,693, 78.2% of N=3,444) to baseline data.  
4 For analysis, data sets with inconsistencies concerning age, gender, and smoking status  
5 were excluded (N=180). The final analysis sample consists of 2,513 data sets (intervention  
6 group: N=1,179, control group: N=1,334).  
7  
8

9  
10 - Insert Figure 1 about here -  
11

## 12 13 **Measures**

14 Data was collected through self-completed anonymous questionnaires by teachers and  
15 students. Development of questionnaire and a complete list of variables and constructs  
16 assessed in the trial have been documented.<sup>19</sup> Analysis presented herein, rely on the  
17 following outcome measures: *Lifetime smoking* experience was assessed by asking how  
18 many cigarettes have ever been smoked in life. Nine answering categories ('none', 'only a  
19 few puffs', '1 cigarette', '2 cigarettes', '3-4 cigarettes', '5-9 cigarettes', '10-19 cigarettes', '20-  
20 100 cigarettes', '>100 cigarettes') were provided. Students having smoked at least a few  
21 puffs were considered as ever smokers. *Smoking incidence* at follow-up among baseline  
22 never smokers was determined by combining answers to lifetime smoking at baseline and  
23 follow-up: those who had never smoked at baseline, and indicated any smoking by the  
24 follow-up survey, even just a few puffs, were considered as having initiated smoking during  
25 the observation period. *Current smoking* frequency was measured by asking how many  
26 cigarettes are currently smoked. Respondents could answer 'I don't smoke,' 'less than once  
27 a month', 'at least once a month, but not weekly', 'at least once a week, but not daily,' or  
28 'daily'. Responses were dichotomized into students not smoking and students indicating any  
29 kind of current smoking.  
30  
31  
32  
33  
34  
35  
36  
37  
38  
39

40  
41 To assess *attitudes towards smoking and risk perception*, respondents should rate eleven  
42 statements (e.g. 'Non-smokers are fitter', 'Non-smokers are cooler', 'If I smoke during the  
43 next month, I will get in trouble with my friends'). Answer categories comprise 0='not true',  
44 1='somewhat true', 2='rather true', and 3= 'totally true', i.e. higher values represent a more  
45 negative attitude towards smoking and more sensitive perception of risk. Cronbach's Alpha  
46 of this scale was 0.80. Change in attitude from baseline to follow-up was determined by  
47 subtracting baseline value from follow-up value for each respondent. *Smoking related*  
48 *knowledge* was tested through seven statements (e.g. 'Cigarettes contain arsenic which is  
49 also found in rat poison.') to which respondents could either agree by answering 'true' or  
50 disagree by stating 'wrong' or state 'I don't know'. As indicator of knowledge, percentage of  
51 correct classification of statements was determined. Increase in knowledge from baseline to  
52 follow-up was determined by subtracting baseline value from follow-up value for each  
53  
54  
55  
56  
57  
58  
59  
60



1  
2  
3 respondent. *Normative expectations* were measured on an 11-point scale ranging from  
4 0='nobody' to 10='everybody' on which students had to estimate how many a) 'Adults in  
5 Germany' and b) 'Adolescents at their age' in Germany smoke. *Self-efficacy* to refuse  
6 cigarette offers were assessed by asking 'To what extent do you dare to refuse cigarettes,  
7 even if your friends laugh at you or suspend you on that account?' with answer categories  
8 ranging from 0='not at all' to 3='totally'. Normative expectations and self-efficacy were  
9 analyzed on single item level.  
10  
11  
12

13  
14  
15 *Covariate measures* were derived from studies that focused on risk factors of adolescent  
16 tobacco use, to control for confounding variables that would be theoretically related to the  
17 smoking measures.<sup>20-22</sup> Sociodemographics include age, gender, type of school (Gymnasium  
18 vs. other type of school), migration background (mother and/or father were born outside  
19 Germany) and socio-economic status (SES, Family Affluence Scale<sup>23</sup>). As personal  
20 characteristics, rebelliousness and sensation-seeking were assessed with two items in each  
21 case.<sup>24,25</sup> Parent, sibling and peer smoking were assessed as factors from social  
22 environment (no vs. any parent/sibling/peer smoking). Finally, students were asked whether  
23 they had participated in a comprehensive prevention program in elementary school with  
24 examples of most broadly disseminated programs given.  
25  
26  
27  
28  
29  
30  
31

### 32 **Procedure**

33 In schools having agreed to participate, teachers of the respective 5<sup>th</sup> grade collected the  
34 parental informed consent. Students with refusal were excluded from all assessments. Data  
35 assessment was conducted in the class room and lasted 45 minutes. Research staff was  
36 responsible for the distribution, help in completion and collection of the questionnaire. To  
37 permit a linking of individual baseline and follow-up data while assuring anonymity, students  
38 generated a seven digit individual code. This procedure has been tested and used in several  
39 studies and therefore been inspected and approved by Ethics Committee, data protection  
40 and Ministries of Education repeatedly.<sup>26</sup> Teachers were not involved in data assessment. At  
41 the end of the assessment, all questionnaires were placed in an envelope which was sealed  
42 in front of the class. Therefore, every student was assured that neither teachers nor parents  
43 were able to see the completed questionnaire.  
44  
45  
46  
47  
48  
49  
50

51 Ethical approval for the trial was gained from the Ethics Committee of Medical Faculty of the  
52 University of Kiel. Additional approvals (e.g., from ministries of education, and parents) were  
53 sought as required.  
54  
55  
56  
57

### 58 **Analyses**

Predictors of attrition were examined by logistic regressions,  $\chi^2$ - and t-tests. To test for selective attrition, interaction effects for group condition and dependent variable were tested. Descriptive statistics (percentages, means, standard deviations) are crude values. To analyze effects of the intervention on smoking behavior as well as on attitudes and knowledge, multilevel mixed effect regression models using Stata *mixed* and *meqrlogit* command were conducted, adjusting for covariates. In case of dichotomous outcomes, effect sizes (Cohen's d) were determined by using the converting formula proposed by Borenstein et al.<sup>27</sup> Effect sizes for metric outcomes were calculated as proposed by Feingold.<sup>28</sup> All data analyses were conducted with Stata V.13.<sup>29</sup>

## RESULTS

### Attrition analysis

Among the 3,444 students assessed at baseline, there was no data available in the analysis sample for 931 students (27.0%). Drop-out was higher in intervention group (N=506, 30.0%) compared to control group (N=425, 24.2%;  $\chi^2(1)=15.02$ ,  $p<0.001$ ). Overall, significantly higher attrition was also found for male students (31.2%;  $p<0.001$ ), students attending other schools than *Gymnasium* (32.1%;  $p<0.001$ ), students with a migration background (36.5%;  $p<0.001$ ), students indicating current smoking (45.7%;  $p=0.004$ ) or current use of alcohol (39.8%;  $p<0.001$ ) at baseline. Furthermore, students dropping out of the study were older ( $M_{\text{attrition}}=10.5$  vs.  $M_{\text{retention}}=10.3$  years of age at baseline;  $p<0.001$ ) and had a lower SES ( $M_{\text{attrition}}=17.1$  vs.  $M_{\text{retention}}=17.9$ ;  $p<0.001$ ) than students in the retention sample. Besides these overall effects, no hints for selective attrition were found, i.e. the associations between variables listed above and attrition did not differ systematically between intervention and control group.

### Effects on smoking behavior

Students in intervention and control group did not differ in rates for lifetime and current smoking at baseline. At follow-up, 16.0% of intervention students indicated that they had ever smoked in their lives compared to 20.2% in the control students (Figure 2). This difference was statistically significant also after controlling for confounding factors (adjusted Odds Ratio [OR]=0.63; 95% confidence interval [CI]=[0.41; 0.96];  $p=0.026$ ).

While about 1% of intervention and control students reported current smoking at baseline, these rates increased to more than 5% at follow-up both in intervention and control group. Therefore, no group differences could be found in frequency of current smoking.

1  
2  
3 At baseline, 95.6% of the sample were never-smokers (N=2,403; IG: 96.4%, CG: 94.9%).  
4 Among these baseline never-smokers, 15.5% initiated smoking during the observation  
5 period. Incidence rate was significantly lower in intervention students, among whom 13.7%  
6 reported first use of cigarettes between baseline and follow-up, compared to control group  
7 with an incidence rate of 17.1% (adjusted OR=0.66, 95% CI=[0.43; 1.00], p=0.047).  
8  
9

10  
11  
12 - insert Figure 2 about here -  
13

### 14 **Effects on smoking related knowledge and attitudes**

15 Students of both groups showed about the same level of smoking related knowledge at  
16 baseline with correct answering rates of about 30% (Table 1). At follow-up, students in both  
17 groups scored better in the knowledge test: intervention students had a mean percentage of  
18 correct answers of 46.75, while intervention students rated on average 37.74% of the  
19 statements correctly. The increase in knowledge was significantly higher in intervention  
20 students (adjusted  $\beta=9.38$ ; 95% CI=[6.73; 12.04];  $p<0.001$ ).  
21  
22  
23  
24  
25

26  
27 - insert Table 1 about here -  
28  
29

30 A comparable pattern was found for attitudes towards smoking: At baseline, both groups did  
31 not differ in their attitudes and showed a rather critical perception of smoking with a mean  
32 score of 2.04 on the scale ranging from 0 to 3 (Table 1). At follow-up, students rated smoking  
33 even more negatively with a mean score of 2.24 in intervention and 2.16 in control group.  
34 Compared to control group, this change in attitudes was more pronounced in intervention  
35 group (adjusted  $\beta=0.10$ ; 95% CI=[0.03; 0.16];  $p=0.002$ ).  
36  
37  
38  
39

40 Normative expectations were hardly influenced by the intervention: While intervention  
41 students estimated smoking prevalence in adults marginally lower at follow-up compared to  
42 their estimation at baseline, a small increase in this estimate could be observed in control  
43 students (Table 1). For peer smoking, both groups showed a small increase in perceived  
44 frequency of smoking. None of these changes turned out to be statistically significant after  
45 covariates and baseline estimates were controlled for.  
46  
47  
48  
49

50  
51  
52 Already at baseline, students in both groups considered themselves rather capable to refuse  
53 cigarette offers (Table 1). During observation period, self-efficacy even grew with a slightly  
54 higher – but statistically insignificant – increase in intervention students compared to control  
55 students.  
56  
57  
58  
59  
60

Table 1.  
 Descriptive statistics and multilevel mixed effects linear regressions for smoking related knowledge, attitudes, perceived norms and self-efficacy to refuse cigarette offers

|                                                 | Baseline             |               | Follow-up      |               | Change        |              | Difference in change |             |        |
|-------------------------------------------------|----------------------|---------------|----------------|---------------|---------------|--------------|----------------------|-------------|--------|
|                                                 | Beginning of grade 5 |               | Mid of grade 7 |               | Intervention  | Control      | adj. $\beta^1$       | 95% CI      | p      |
|                                                 | Intervention         | Control       | Intervention   | Control       |               |              |                      |             |        |
|                                                 | M (SD)               | M (SD)        | M (SD)         | M (SD)        | M (SD)        | M (SD)       |                      |             |        |
| Knowledge <sup>2</sup>                          | 30.34 (19.47)        | 30.11 (19.14) | 46.75 (21.59)  | 37.74 (20.45) | 16.53 (26.46) | 7.53 (24.13) | 9.38                 | 6.73; 12.04 | <0.001 |
| Attitudes/risk perception <sup>3</sup>          | 2.04 (0.51)          | 2.04 (0.51)   | 2.24 (0.51)    | 2.16 (0.54)   | 0.20 (0.61)   | 0.12 (0.61)  | 0.10                 | 0.03; 0.16  | 0.002  |
| Norms adult smoking <sup>4</sup>                | 6.08 (1.62)          | 5.97 (1.59)   | 6.04 (1.62)    | 6.09 (1.55)   | -0.03 (2.09)  | 0.12 (1.95)  | -0.08                | -0.24; 0.07 | 0.265  |
| Norms peer smoking <sup>4</sup>                 | 3.08 (2.64)          | 2.93 (2.56)   | 4.24 (2.28)    | 4.02 (2.18)   | 1.16 (3.10)   | 1.10 (2.93)  | 0.15                 | -0.13; 0.43 | 0.283  |
| Self-efficacy to refuse cigarettes <sup>5</sup> | 2.38 (1.04)          | 2.36 (1.03)   | 2.53 (0.80)    | 2.49 (0.85)   | 0.15 (1.20)   | 0.11 (1.22)  | 0.07                 | -0.03; 0.17 | 0.140  |

M = Mean, SD = Standard deviation, CI = Confidence interval

<sup>1</sup> Adjusted for age, gender, type of school, socio-economic status, immigration background, peer / parent / sibling smoking, sensation seeking, rebelliousness, earlier participation in prevention program, baseline value of the respective variable

<sup>2</sup> Mean percentage of correct answers in a 7-item quiz

<sup>3</sup> Range 0 to 3, higher values representing more negative attitude

<sup>4</sup> Range 0 = nobody smokes to 10 = everybody smokes

<sup>5</sup> Range 0-3, higher values representing higher self-efficacy

1  
2  
3 Effect sizes for significant program effects were small to medium with  $d=0.26$  (lifetime  
4 smoking),  $d=0.23$  (incidence of smoking),  $d=0.45$  (smoking related knowledge), and  $d=0.15$   
5 (attitudes/risk perception).  
6  
7  
8  
9

## 10 DISCUSSION

11 The current study aimed to investigate effects of a school-based prevention program on  
12 smoking related knowledge, attitudes and behavior six months after end of program  
13 implementation. Using a cluster randomized controlled design, findings revealed that  
14 program participation seems to reduce prevalence and incidence of lifetime smoking, to  
15 increase smoking related knowledge, and to influence attitudes and perceived risks of  
16 smoking towards a more critical perception. Program effects on prevalence of current  
17 smoking, normative expectations or refusal skills could not be determined. Using Cohen's  
18 classification of effect sizes,<sup>30</sup> effect size was small for smoking behavior and attitudes, while  
19 there was a medium effect on smoking related knowledge.  
20  
21  
22  
23  
24  
25  
26

27 The pattern found for effects on smoking behavior with significant small effects on smoking  
28 incidence ( $d=0.23$ ) and lifetime smoking ( $d=0.26$ ), and no effect on current smoking can be  
29 aligned quite well with results presented in former meta-analyses: The pooled odds ratio of  
30 0.88 for smoking onset at longest follow-up revealed by the overall analysis of Thomas et  
31 al.<sup>12</sup> corresponds to an effect size of  $d=0.07$ , while their subgroup analyses for different  
32 intervention approaches provided even moderate effect sizes (odds ratios between 0.49 and  
33 0.52 corresponding to  $d$ 's between 0.36 and 0.39). Earlier meta-analyses on school-based  
34 drug prevention programs,<sup>13</sup> psychosocial smoking prevention programs<sup>14</sup> or studies on  
35 Project DARE (Drug Abuse Resistance Education),<sup>15</sup> the most widely used school-based  
36 drug prevention program in the United States and focusing on teaching skills to recognize  
37 and resist social pressure, also determined small program effects on substance use with  $d$ 's  
38 ranging between 0.08 and 0.18. Finding no effect on current smoking might also be  
39 explained to some extent by the young age of the sample with only very few students  
40 smoking already on a regular basis.  
41  
42  
43  
44  
45  
46  
47  
48  
49

50 Participation in "Eigenständig werden 5+6" significantly increased smoking related  
51 knowledge with an effect size of  $d=0.45$  – the highest effect found in our analyses. This  
52 medium effect is in line with effect sizes ranging from 0.36 to 0.42 determined in meta-  
53 analyses referred to above.<sup>13-15</sup> Attitudes were influenced also significantly by the  
54 intervention, the small effect ( $d=0.15$ ) compares well with small effects in a range from 0.11  
55 to 0.26 having been reported.<sup>13-15</sup>  
56  
57  
58  
59  
60

1  
2  
3  
4 We were not able to show an effect of the intervention in correcting perceived norms of  
5 smoking or self-efficacy to refuse offered cigarettes. Students of both intervention and control  
6 group consider themselves to be rather highly self-efficacious to resist to cigarette offers  
7 already at the outset of the study and this rating even increases in both groups at follow-up,  
8 i.e. a ceiling effect might decrease discriminative power of the group comparisons. As far as  
9 perceived norms of smoking are concerned, a possible explanation of the null-effect is the  
10 fact that only a minor part of the intervention (one subtask among nine tasks of the smoking  
11 workshop at the end of grade 5) deals with the topic of norms. Most tasks in the workshop  
12 address facts about and visualization of short- and long-term consequences of smoking,  
13 others aim to scrutinize strategies of tobacco industry or to foster resistance skills.  
14  
15  
16  
17  
18  
19  
20

21 Some limitations of the current study have to be considered: There has been some drop-out  
22 from the study from baseline to follow-up; the analysis sample (N=2,513) amounted to 73.0%  
23 of the baseline sample (N=3,444). Nevertheless, we did not find any hints for selective  
24 attrition which could restrict the validity of findings. The curriculum "Eigenständig werden  
25 5+6" comprises of 14 lessons à on average 90 minutes and two workshops with 4 to 6 hours  
26 of duration which are implemented by teachers in addition to usual education, i.e. the  
27 program is quite time-consuming, it requires some dedication by teachers and it seems  
28 unreasonable to assume that the intervention is delivered to all classes exactly in the way  
29 and to the extent foreseen by the manual. Analyses in this report were not controlled for  
30 treatment integrity,<sup>31;32</sup> i.e. classes with low treatment fidelity and having been exposed only  
31 to parts of the intervention contribute to the same extent to the results of the intervention  
32 group as classes with complete program implementation and results can be considered as  
33 rather conservative. Another limitation is the reliance on self-reports in the assessment of  
34 outcomes. Especially for outcomes assessing smoking behavior, but also for attitudes  
35 towards smoking, answers might be biased by social desirability. These influences might  
36 occur more likely in the intervention group since students might be primed by the intervention  
37 that smoking is an "unwanted" behavior. Nevertheless, since purchase of cigarettes and  
38 smoking in public is forbidden by law for minors in Germany, also the students in the control  
39 condition are not free of a social desirability bias. For other outcomes like the assessment of  
40 refusal skills, validity of self-report data might be limited by restricted accessibility, i.e.  
41 whether adolescents are really able to judge their own competence to resist cigarette offers.  
42 Finally, the study was run in four federal states of Germany, i.e. generalizability might be  
43 limited due to these regional constraints.  
44  
45  
46  
47  
48  
49  
50  
51  
52  
53  
54  
55  
56  
57  
58  
59  
60

1  
2  
3 On the other hand, some strengths of the current studies should be born in mind: Results  
4 were derived from a cluster randomized controlled trial, applying sophisticated statistical  
5 methods, comprising a range of several outcomes and following students up for six months  
6 after the end of intervention. Therefore, we implemented rather rigorous evaluation methods,  
7 which are in line with recommendations like those of the Society for Prevention Research.<sup>33</sup>  
8  
9

10  
11 Perspectives and open questions for future research might be the following: In the current  
12 trial, a further follow-up at 15 months after end of intervention is being conducted to explore  
13 stability of effects in the longer term. Furthermore, exploring effects on other outcomes than  
14 smoking, e.g. alcohol use or life skills, is owing for the current study. Finally, besides stating  
15 whether an intervention is effective or not, mechanisms by which shown effects can be  
16 explained theoretically and empirically are to be explored. These mediation analyses may  
17 contribute to investigate causal models for preventive intervention, e.g. to explore whether  
18 knowledge or change in attitude are necessary preconditions for behavior change.<sup>13</sup>  
19  
20  
21  
22  
23  
24  
25  
26  
27  
28  
29  
30  
31  
32  
33  
34  
35  
36  
37  
38  
39  
40  
41  
42  
43  
44  
45  
46  
47  
48  
49  
50  
51  
52  
53  
54  
55  
56  
57  
58  
59  
60



## Figure legends

Figure 1. Participation flowchart

Figure 2. Percentage of lifetime smoking, current smoking at baseline and 6-month follow-up, percentage of smoking incidence at 6-month follow-up among baseline never-smokers, and multilevel mixed effects logistic regressions; OR = odds ratio, CI = confidence interval; logistic regressions were adjusted for age, gender, type of school, socio-economic status, immigration background, peer / parent / sibling smoking, sensation seeking, rebelliousness, earlier participation in prevention program

## Acknowledgements

Marianne Bayrhuber contributed to the completion of the project by organizing the data assessments. Maja Hornberger, Gudrun Wiborg, Birte Walther, Hinnerk Frahm and Heike Kühl-Frese were involved in the development of the prevention program. Malin Bachmann, Tina Basner, Jana Blumkowski, Dorothea Breckwoldt, Roxana Buzila, Svenja Cleve, Malte Dincher, Eva-Maria Eggers, Nadia El Bouhayati, Almut Engelhardt, Sigrid Feierabend, Sarah Göhlert, Lars Grabbe, Judith Hanewinkel, Oksana Herdt, Semiha Idrizovic, Sabiha Izaamriouane, Martin Karsten, Andre Lischick, Stefanie Otte, Serdar Peker, Ines Pohlmann, Wiebke Pustal, Gesa Sander, Christoph Schlüter, Björn Seiler, Beate Steiber, Alexander Wierzock and Nicole Wilmes assessed the data.

We would like to thank our partners: Institut für Qualitätsentwicklung an Schulen Schleswig-Holstein, Landesinstitut für Schule Bremen, Krisenhilfe Bochum, Fachstelle für Suchtprävention im Wetteraukreis, Fachstelle für Suchtprävention des Zweckverbandes der Diakonie Bad Hersfeld, Diakonie Herford, Koordinationsstelle Schulische Suchtvorbeugung, Fachstelle für Suchtvorbeugung Dortmund, Hessische Landesstelle für Suchtfragen, Ginko Stiftung für Prävention, and all schools that participated in the study.

## Funding

This work was supported by German Cancer Aid (Grant Number: 108374).

## Competing interests

None.

## Ethics approval

Ethics approval was provided by the Ethics Committee of the Medical Faculty of the University of Kiel (Ref.: D 419/10).



**Contributors**

BI performed the statistical analysis and interpretation of data and drafted the manuscript. JH contributed to acquisition of data and participated in drafting the manuscript. KM contributed to acquisition and management of data. RH as principle investigator is responsible for study concept, design and supervision and helped in drafting the manuscript.

All authors had full access to all of the data in the study and take responsibility for the integrity of the data and the accuracy of the data analysis. All authors conducted a critical revision of the article and granted final approval of the article for important intellectual content.

**Data sharing statement**

No additional data available.

## REFERENCES

- (1) Lim SS, Vos T, Flaxman AD, Danaei G, et al. A comparative risk assessment of burden of disease and injury attributable to 67 risk factors and risk factor clusters in 21 regions, 1990-2010: a systematic analysis for the Global Burden of Disease Study 2010. *Lancet* 2013; 380(9859):2224-2260.
- (2) Bundeszentrale für gesundheitliche Aufklärung. Der Tabakkonsum Jugendlicher und junger Erwachsener in Deutschland 2012. Ergebnisse einer aktuellen Repräsentativbefragung und Trends. Köln: Bundeszentrale für gesundheitliche Aufklärung; 2013.
- (3) World Health Organisation. Life skills education in schools, parts 1 and 2. Geneva: WHO, Division of Mental Health; 1994.
- (4) Evans RI. Smoking in children: developing a social psychological strategy of deterrence. *Prev Med* 1976; 51:122-127.
- (5) Donaldson SI, Graham JW, Hansen WB. Testing the generalizability of intervening mechanism theories: understanding the effects of adolescent drug use prevention interventions. *J Behav Med* 1994; 17(2):195-216.
- (6) Flay BR. The promise of long-term effectiveness of school-based smoking prevention programs: a critical review of reviews. *Tob Induc Dis* 2009; 5(1):7.
- (7) Cuijpers P. Effective ingredients of school-based drug prevention programs. A systematic review. *Addict Behav* 2002; 27(6):1009-1023.
- (8) Gottfredson DC, Wilson DB. Characteristics of effective school-based substance abuse prevention. *Prev Sci* 2003; 4(1):27-38.
- (9) Flay BR. School-based smoking prevention programs with the promise of long-term effects. *Tob Induc Dis* 2009; 5(1):6.
- (10) Skara S, Sussman S. A review of 25 long-term adolescent tobacco and other drug use prevention program evaluations. *Prev Med* 2003; 37(5):451-474.
- (11) Wiehe SE, Garrison MM, Christakis DA, Ebel BE, Rivara FP. A systematic review of school-based smoking prevention trials with long-term follow-up. *J Adolesc Health* 2005; 36(3):162-169.
- (12) Thomas RE, McLellan J, Perera R. School-based programmes for preventing smoking. *Cochrane Database Syst Rev* 2013; 4:CD001293.
- (13) Tobler NS, Stratton HH. Effectiveness of school-based drug prevention programs: a meta-analysis of the research. *J Prim Prev* 1997; 18(1):71-128.
- (14) Hwang MS, Yeagley KL, Petosa R. A meta-analysis of adolescent psychosocial smoking prevention programs published between 1978 and 1997 in the United States. *Health Educ Behav* 2004; 31(6):702-719.

- 1  
2  
3 (15) Ennett ST, Tobler NS, Ringwalt CL, Flewelling RL. How effective is drug abuse  
4 resistance education? A meta-analysis of Project DARE outcome evaluations. *Am J*  
5 *Public Health* 1994; 84(9):1394-1401.  
6  
7 (16) Müller-Riemenschneider F, Rasch A, Bockelbrink A, Vauth C, Willich SN, Greiner W.  
8 Effectiveness and cost-effectiveness of behavioural strategies in the prevention of  
9 cigarette smoking. *GMS Health Technol Assess* 2008; 4:Doc10.  
10  
11 (17) Cuijpers P. Three decades of drug prevention research. *Drug Educ Prev Polic* 2003;  
12 10(1):7-20.  
13  
14 (18) Hansen WB, Dusenbury L, Bishop D, Derzon JH. Substance abuse prevention  
15 program content: systematizing the classification of what programs target for change.  
16 *Health Educ Res* 2007; 22(3):351-360.  
17  
18 (19) Hansen J, Hanewinkel R, Maruska K, Isensee B. The 'Eigenständig werden'  
19 prevention trial: a cluster randomised controlled study on a school-based life skills  
20 programme to prevent substance use onset. *BMJ Open* 2011; 1(2):e000352.  
21  
22 (20) Gibbons FX, Gerrard M. Predicting young adults' health risk behavior. *J Pers Soc*  
23 *Psychol* 1995; 69(3):505-517.  
24  
25 (21) Hawkins JD, Catalano RF, Miller JY. Risk and protective factors for alcohol and other  
26 drug problems in adolescence and early adulthood: implications for substance abuse  
27 prevention. *Psychol Bull* 1992; 112(1):64-105.  
28  
29 (22) Petraitis J, Flay BR, Miller TQ. Reviewing theories of adolescent substance use:  
30 organizing pieces in the puzzle. *Psychol Bull* 1995; 117(1):67-86.  
31  
32 (23) Currie C, Molcho M, Boyce W, Holstein B, Torsheim T, Richter M. Researching health  
33 inequalities in adolescents: the development of the Health Behaviour in School-Aged  
34 Children (HBSC) family affluence scale. *Soc Sci Med* 2008; 66(6):1429-1436.  
35  
36 (24) Stephenson MT, Hoyle RH, Palmgreen P, Slater MD. Brief measures of sensation  
37 seeking for screening and large-scale surveys. *Drug Alcohol Depend* 2003;  
38 72(3):279-286.  
39  
40 (25) Burt RD, Dinh KT, Peterson Jr AV, Sarason IG. Predicting adolescent smoking: a  
41 prospective study of personality variables. *Prev Med* 2000; 30(2):115-125.  
42  
43 (26) Galanti MR, Siliquini R, Cuomo L, Melero JC, Panella M, Faggiano F. Testing  
44 anonymous link procedures for follow-up of adolescents in a school-based trial: The  
45 EU-DAP pilot study. *Prev Med* 2007; 44(2):174-177.  
46  
47 (27) Borenstein M, Hedges LV, Higgins JPT, Rothstein HR. Introduction to meta-analysis.  
48 Chichester: Jon Wiley & Sons; 2009.  
49  
50 (28) Feingold A. Effect sizes for growth-modeling analysis for controlled clinical trials in the  
51 same metric as for classical analysis. *Psychol Methods* 2009; 14(1):43-53.  
52  
53 (29) StataCorp. Stata Statistical Software: Release 13. College Stations, Texas:  
54 StataCorp; 2013.  
55  
56 (30) Cohen J. Statistical power analyses for behavioral science. Hilldale, New York:  
57 Erlbaum; 1988.  
58  
59  
60

- 1  
2  
3 (31) Bishop DC, Pankratz MM, Hansen WB, Albritton J, Albritton L, Strack J. Measuring  
4 Fidelity and Adaptation: Reliability of a Instrument for School-Based Prevention  
5 Programs. *Eval Health Prof* 2013.  
6  
7 (32) Dusenbury L, Brannigan R, Falco M, Hansen WB. A review of research on fidelity of  
8 implementation: implications for drug abuse prevention in school settings. *Health*  
9 *Educ Res* 2003; 18(2):237-256.  
10  
11 (33) Flay BR, Biglan A, Boruch RF, Castro FG, Gottfredson D, Kellam S et al. Standards  
12 of evidence: criteria for efficacy, effectiveness and dissemination. *Prev Sci* 2005;  
13 6(3):151-175.  
14  
15  
16  
17  
18  
19  
20  
21  
22  
23  
24  
25  
26  
27  
28  
29  
30  
31  
32  
33  
34  
35  
36  
37  
38  
39  
40  
41  
42  
43  
44  
45  
46  
47  
48  
49  
50  
51  
52  
53  
54  
55  
56  
57  
58  
59  
60

For peer review only

**BMJ Open**  
Assessed for eligibility: 450 schools

**Denial:**  
79 schools (17,5%)  
**No statement:**  
323 schools (71,5%)

Randomisation: 48 schools (11%)

**Allocated to intervention group**  
26 schools/ 97 classes  
2,437 students

**Allocated to control group**  
22 schools/ 94 classes  
2,335 students

Withdrawal of consent:  
schools:  
3 schools, 12 classes, 321 students  
teachers:  
4 classes, 102 students

Withdrawal of consent:  
teachers:  
3 classes, 84 students

No parental permission:  
231 students  
Absent:  
98 students

No parental permission:  
361 students  
Absent:  
131 students

**Baseline Assessment**  
23 schools/ 81 classes  
1,685 students

**Baseline Assessment**  
22 schools/ 91 classes  
1,759 students

Drop-out of 14 classes with 316 students

Drop-out of 7 classes with 150 students

**Follow-up Assessment**  
Available data:  
21 schools/ 67 classes/ 1,407 students  
Matched to baseline: 1,255 students

**Follow-up Assessment**  
Available data:  
21 schools/ 84 classes/ 1,678 students  
Matched to baseline: 1,438 students

Excluded due to inconsistent data: 76 students

Excluded due to inconsistent data: 104 students

**Analysis Sample**  
1,179 students

**Analysis Sample**  
1,334 students

1  
2  
3  
4  
5  
6  
7  
8  
9  
10  
11  
12  
13  
14  
15  
16  
17  
18  
19  
20  
21  
22  
23  
24  
25  
26  
27  
28  
29  
30  
31  
32  
33  
34  
35  
36  
37  
38  
39  
40  
41  
42  
43

1  
2  
3  
4  
5  
6  
7  
8  
9  
10  
11  
12  
13  
14  
15  
16  
17  
18  
19  
20  
21  
22  
23  
24  
25  
26  
27  
28  
29  
30  
31  
32  
33  
34  
35  
36  
37  
38  
39  
40  
41  
42  
43  
44  
45  
46  
47  
48  
49  
50  
51  
52  
53  
54  
55  
56  
57  
58  
59  
60

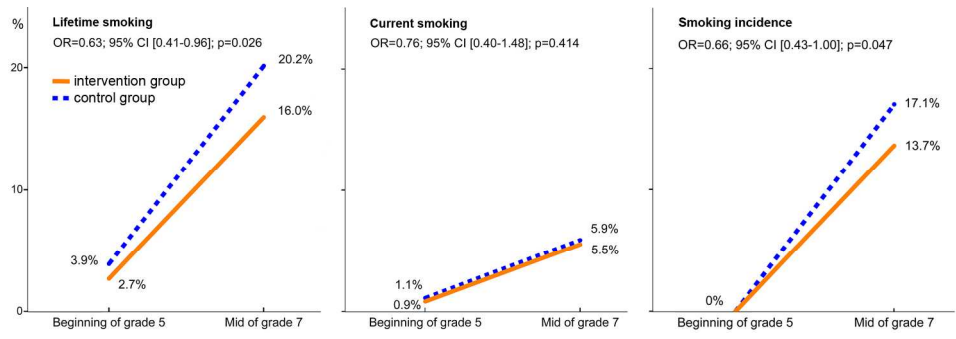

202x65mm (300 x 300 DPI)

peer review only

**Table 1: CONSORT 2010 checklist of information to include when reporting a cluster randomised trial**

| Section/Topic                    | Item No | Standard Checklist item                                                                                                               | Extension for cluster designs                                                                   | Page No * |
|----------------------------------|---------|---------------------------------------------------------------------------------------------------------------------------------------|-------------------------------------------------------------------------------------------------|-----------|
| <b>Title and abstract</b>        |         |                                                                                                                                       |                                                                                                 |           |
|                                  | 1a      | Identification as a randomised trial in the title                                                                                     | Identification as a cluster randomised trial in the title                                       | p. 1      |
|                                  | 1b      | Structured summary of trial design, methods, results, and conclusions (for specific guidance see CONSORT for abstracts)               | See table 2                                                                                     | p. 2      |
| <b>Introduction</b>              |         |                                                                                                                                       |                                                                                                 |           |
| <b>Background and objectives</b> | 2a      | Scientific background and explanation of rationale                                                                                    | Rationale for using a cluster design                                                            | p. 5      |
|                                  | 2b      | Specific objectives or hypotheses                                                                                                     | Whether objectives pertain to the cluster level, the individual participant level or both       | p. 5      |
| <b>Methods</b>                   |         |                                                                                                                                       |                                                                                                 |           |
| <b>Trial design</b>              | 3a      | Description of trial design (such as parallel, factorial) including allocation ratio                                                  | Definition of cluster and description of how the design features apply to the clusters          | p. 6      |
|                                  | 3b      | Important changes to methods after trial commencement (such as eligibility criteria), with reasons                                    |                                                                                                 | p. 6      |
| <b>Participants</b>              | 4a      | Eligibility criteria for participants                                                                                                 | Eligibility criteria for clusters                                                               | p. 6      |
|                                  | 4b      | Settings and locations where the data were collected                                                                                  |                                                                                                 | p. 6      |
| <b>Interventions</b>             | 5       | The interventions for each group with sufficient details to allow replication, including how and when they were actually administered | Whether interventions pertain to the cluster level, the individual participant level or both    | p. 5      |
| <b>Outcomes</b>                  | 6a      | Completely defined pre-specified primary and secondary outcome measures, including how and                                            | Whether outcome measures pertain to the cluster level, the individual participant level or both | p. 7      |

|                                         |     |                                                                                                                                                                                             |                                                                                                                                                                                                                         |      |
|-----------------------------------------|-----|---------------------------------------------------------------------------------------------------------------------------------------------------------------------------------------------|-------------------------------------------------------------------------------------------------------------------------------------------------------------------------------------------------------------------------|------|
|                                         |     | when they were assessed                                                                                                                                                                     |                                                                                                                                                                                                                         |      |
|                                         | 6b  | Any changes to trial outcomes after the trial commenced, with reasons                                                                                                                       |                                                                                                                                                                                                                         | n.a. |
| <b>Sample size</b>                      | 7a  | How sample size was determined                                                                                                                                                              | Method of calculation, number of clusters(s) (and whether equal or unequal cluster sizes are assumed), cluster size, a coefficient of intracluster correlation (ICC or <i>k</i> ), and an indication of its uncertainty | p. 6 |
|                                         | 7b  | When applicable, explanation of any interim analyses and stopping guidelines                                                                                                                |                                                                                                                                                                                                                         | n.a. |
| <b>Randomisation:</b>                   |     |                                                                                                                                                                                             |                                                                                                                                                                                                                         |      |
| <b>Sequence generation</b>              | 8a  | Method used to generate the random allocation sequence                                                                                                                                      |                                                                                                                                                                                                                         | p. 6 |
|                                         | 8b  | Type of randomisation; details of any restriction (such as blocking and block size)                                                                                                         | Details of stratification or matching if used                                                                                                                                                                           | p. 6 |
| <b>Allocation concealment mechanism</b> | 9   | Mechanism used to implement the random allocation sequence (such as sequentially numbered containers), describing any steps taken to conceal the sequence until interventions were assigned | Specification that allocation was based on clusters rather than individuals and whether allocation concealment (if any) was at the cluster level, the individual participant level or both                              | p. 6 |
| <b>Implementation</b>                   | 10  | Who generated the random allocation sequence, who enrolled participants, and who assigned participants to interventions                                                                     | Replace by 10a, 10b and 10c                                                                                                                                                                                             |      |
|                                         | 10a |                                                                                                                                                                                             | Who generated the random allocation sequence, who enrolled clusters, and who assigned clusters to interventions                                                                                                         | p. 6 |
|                                         | 10b |                                                                                                                                                                                             | Mechanism by which individual participants were included in clusters for the purposes of the trial (such as complete                                                                                                    | p. 6 |



|                                                             |     |                                                                                                                                                |                                                                                                                                                                     |                  |
|-------------------------------------------------------------|-----|------------------------------------------------------------------------------------------------------------------------------------------------|---------------------------------------------------------------------------------------------------------------------------------------------------------------------|------------------|
|                                                             |     |                                                                                                                                                | enumeration, random sampling)                                                                                                                                       |                  |
|                                                             | 10c |                                                                                                                                                | From whom consent was sought (representatives of the cluster, or individual cluster members, or both), and whether consent was sought before or after randomisation | p. 8             |
| <b>Blinding</b>                                             | 11a | If done, who was blinded after assignment to interventions (for example, participants, care providers, those assessing outcomes) and how       |                                                                                                                                                                     | n.a.             |
|                                                             | 11b | If relevant, description of the similarity of interventions                                                                                    |                                                                                                                                                                     | n.a.             |
| <b>Statistical methods</b>                                  | 12a | Statistical methods used to compare groups for primary and secondary outcomes                                                                  | How clustering was taken into account                                                                                                                               | p. 9             |
|                                                             | 12b | Methods for additional analyses, such as subgroup analyses and adjusted analyses                                                               |                                                                                                                                                                     | p. 9             |
| <b>Results</b>                                              |     |                                                                                                                                                |                                                                                                                                                                     |                  |
| <b>Participant flow (a diagram is strongly recommended)</b> | 13a | For each group, the numbers of participants who were randomly assigned, received intended treatment, and were analysed for the primary outcome | For each group, the numbers of clusters that were randomly assigned, received intended treatment, and were analysed for the primary outcome                         | p. 6<br>Figure 1 |
|                                                             | 13b | For each group, losses and exclusions after randomisation, together with reasons                                                               | For each group, losses and exclusions for both clusters and individual cluster members                                                                              | p.6              |
| <b>Recruitment</b>                                          | 14a | Dates defining the periods of recruitment and follow-up                                                                                        |                                                                                                                                                                     | p. 6             |
|                                                             | 14b | Why the trial ended or was stopped                                                                                                             |                                                                                                                                                                     | n.a.             |
| <b>Baseline data</b>                                        | 15  | A table showing baseline demographic and clinical                                                                                              | Baseline characteristics for the individual and cluster levels as                                                                                                   |                  |

|                                |     | characteristics for each group                                                                                                                    | applicable for each group                                                                                                                  |        |
|--------------------------------|-----|---------------------------------------------------------------------------------------------------------------------------------------------------|--------------------------------------------------------------------------------------------------------------------------------------------|--------|
| <b>Numbers analysed</b>        | 16  | For each group, number of participants (denominator) included in each analysis and whether the analysis was by original assigned groups           | For each group, number of clusters included in each analysis                                                                               | p. 6   |
| <b>Outcomes and estimation</b> | 17a | For each primary and secondary outcome, results for each group, and the estimated effect size and its precision (such as 95% confidence interval) | Results at the individual or cluster level as applicable and a coefficient of intracluster correlation (ICC or k) for each primary outcome | p. 9-  |
|                                | 17b | For binary outcomes, presentation of both absolute and relative effect sizes is recommended                                                       |                                                                                                                                            | p. 9-  |
| <b>Ancillary analyses</b>      | 18  | Results of any other analyses performed, including subgroup analyses and adjusted analyses, distinguishing pre-specified from exploratory         |                                                                                                                                            | p. 9-  |
| <b>Harms</b>                   | 19  | All important harms or unintended effects in each group (for specific guidance see CONSORT for harms)                                             |                                                                                                                                            |        |
| <b>Discussion</b>              |     |                                                                                                                                                   |                                                                                                                                            |        |
| <b>Limitations</b>             | 20  | Trial limitations, addressing sources of potential bias, imprecision, and, if relevant, multiplicity of analyses                                  |                                                                                                                                            | p. 13  |
| <b>Generalisability</b>        | 21  | Generalisability (external validity, applicability) of the trial findings                                                                         | Generalisability to clusters and/or individual participants (as relevant)                                                                  | p. 13  |
| <b>Interpretation</b>          | 22  | Interpretation consistent with results, balancing benefits and harms, and considering other relevant evidence                                     |                                                                                                                                            | p. 12- |
| <b>Other information</b>       |     |                                                                                                                                                   |                                                                                                                                            |        |
| <b>Registration</b>            | 23  | Registration number and                                                                                                                           |                                                                                                                                            | p. 2   |

|                 |    |                                                                                 |       |
|-----------------|----|---------------------------------------------------------------------------------|-------|
|                 |    | name of trial registry                                                          |       |
| <b>Protocol</b> | 24 | Where the full trial protocol can be accessed, if available                     | p. 6  |
| <b>Funding</b>  | 25 | Sources of funding and other support (such as supply of drugs), role of funders | p. 15 |

\* Note: page numbers optional depending on journal requirements

For peer review only

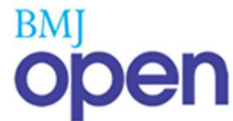

**Effects of a School-Based Prevention Program on Smoking  
in early Adolescence: Six-Month Follow-up of the  
'Eigenständig werden' Cluster Randomized Trial**

|                                 |                                                                                                                                                                                                                                                            |
|---------------------------------|------------------------------------------------------------------------------------------------------------------------------------------------------------------------------------------------------------------------------------------------------------|
| Journal:                        | <i>BMJ Open</i>                                                                                                                                                                                                                                            |
| Manuscript ID:                  | bmjopen-2013-004422.R1                                                                                                                                                                                                                                     |
| Article Type:                   | Research                                                                                                                                                                                                                                                   |
| Date Submitted by the Author:   | 10-Dec-2013                                                                                                                                                                                                                                                |
| Complete List of Authors:       | Isensee, Barbara; Institute for Therapy and Health Research, IFT-Nord, Hansen, Julia; Institute for Therapy and Health Research, Maruska, Karin; Institute for Therapy and Health Research, Hanewinkel, Reiner; Institute for Therapy and Health Research, |
| <b>Primary Subject Heading</b>: | Public health                                                                                                                                                                                                                                              |
| Secondary Subject Heading:      | Addiction, Smoking and tobacco                                                                                                                                                                                                                             |
| Keywords:                       | Substance misuse < PSYCHIATRY, PUBLIC HEALTH, school based prevention, smoking, cluster randomized controlled trial, efficacy                                                                                                                              |
|                                 |                                                                                                                                                                                                                                                            |

SCHOLARONE™  
Manuscripts

1  
2  
3 Effects of a School-Based Prevention Program on Smoking in early Adolescence: Six-Month  
4 Follow-up of the 'Eigenständig werden' Cluster Randomized Trial  
5  
6

7 Barbara Isensee, Julia Hansen, Karin Maruska, Reiner Hanewinkel  
8  
9 Institute for Therapy and Health Research (IFT-Nord)  
10  
11 Harmsstr. 2  
12  
13 24114 Kiel, Germany  
14

15 Corresponding Author:

16 Barbara Isensee

17  
18 Phone: +49 (0)431 5702930

19  
20 Fax: +49 (0)431 5702929

21  
22 Email: isensee@ift-nord  
23  
24

25  
26 Key words: smoking; school-based prevention; cluster randomized controlled trial; efficacy  
27  
28

29  
30 Word count main text: 4,398  
31  
32  
33  
34  
35  
36  
37  
38  
39  
40  
41  
42  
43  
44  
45  
46  
47  
48  
49  
50  
51  
52  
53  
54  
55  
56  
57  
58  
59  
60

## ABSTRACT

**Objectives:** To test the effects of a school-based prevention program on students' smoking related behavior, attitudes and knowledge six months after implementation over two school-years has ended.

**Design:** Two-arm prospective cluster randomized controlled trial with a follow-up survey six months after end of program implementation, i.e. 26 months after baseline.

**Setting:** Forty-five public secondary schools from four federal states in Germany (Bremen, Hesse, North Rhine-Westphalia, Schleswig-Holstein).

**Participants:** A total of 3,444 students from 172 classes with a mean age of 10.37 years (SD=0.59) and 47.9% girls at baseline. Analysis sample with follow-up up data merged to baseline data comprises 2,513 data sets (73.0%).

**Intervention:** "Eigenständig werden 5+6", a school-based prevention program for grade five and six to enhance substance specific and general life skills, consisting of 14 units (à 90 minutes) and two workshops (4-6 hours) being taught over a time period of two school-years by trained teachers.

**Outcome measures:** Lifetime and current smoking, incidence of smoking in baseline never smokers, smoking related knowledge, attitudes, perceived norms of smoking, self-efficacy to refuse cigarette offers were assessed in students.

**Results:** Six months after end of program implementation, students of intervention classes showed significantly lower rates for lifetime smoking (adjusted odds ratio [OR]=0.63;95% confidence interval [CI]=[0.41; 0.96];p=0.026) and incidence of smoking (adjusted OR=0.66; 95%CI=[0.43; 1.00];p=0.047), a higher increase of smoking related knowledge (adjusted  $\beta$ =9.38; 95%CI=[6.73; 12.04];p<0.001) and a greater change in attitudes towards a more critical perception of risks and disadvantages of smoking (adjusted  $\beta$ =0.10; 95%CI=[0.03; 0.16];p=0.002). No group differences were found for current smoking, perceived norms of smoking and self-efficacy to refuse cigarette offers.

**Conclusions:** Participation in the school-based prevention program "Eigenständig werden 5+6" may have small effects on smoking behavior and attitudes and a moderate effect on smoking related knowledge.

**Trial registration:** Current Controlled Trials ISRCTN99442407

Word count abstract: 298 words

## ARTICLE SUMMARY

### Article focus

- School-based prevention programs show inconsistent results concerning efficacy and most of evaluation studies were conducted in the US.
- This study investigates the effects of a prevention program implemented in young adolescents in German schools on different outcomes six months after the end of the two school-years lasting program implementation using rigorous evaluation methodology.

### Key messages

- Program participation seems to reduce the prevalence and incidence of lifetime smoking, to increase smoking related knowledge, and to influence attitudes towards a more critical perception of smoking.

### Strengths and limitations of this study

- Findings were retrieved from a cluster randomized controlled trial with a well-powered sample and under usage of sophisticated statistical methods controlling for confounders and taking clustering of data into account.
- Drop out, reliance on self-reports and lack of control for treatment integrity may be limiting factors to this study.

## BACKGROUND

Smoking remains to be the single greatest preventable cause of mortality worldwide, being a major risk factor for a number of life-threatening diseases, including various cancers, cardiovascular diseases and lung diseases.<sup>1</sup> Though reductions in smoking rates in adolescents have been documented for many Western countries including Germany<sup>2</sup> over the last decade, smoking prevention is still a main issue for public health. Most recent data from Germany reveal smoking rates of about 12% for both female and male adolescents aged 12 to 17 years and 6.6% for young adolescents aged 12 to 15 years.<sup>2,3</sup>

School programs are often one of the first approaches mentioned in efforts to denormalize tobacco use and to raise awareness of tobacco's hazardous nature. Prominent approaches to prevent smoking in students are the development and improvement of general life skills, as well as the fostering of skills for resisting social influence and substance-specific skills in adolescence. General life skills are considered to empower adolescents in challenging situations and to help them to master life as competent as possible.<sup>4</sup> By enhancing these skills, it is assumed to prevent substance use and abuse, since substance use is considered as a dysfunctional strategy to cope with every day challenges and developmental tasks in adolescence. In line with the social influence approach,<sup>5</sup> smoking is conceptualized as a result of influences emerging from the adolescent's environment like peers, family, or media by normative processes and/or overt cigarette offers. Therefore, correction of inaccurate norms is one important component of these programs to adjust the often overestimated prevalence of smoking in adolescence towards more conservative and realistic norms.<sup>6</sup> Skill training following these approaches is considered to 'inoculate' students against influences encouraging them to smoke, to help them resist temptations from peers to smoke and to correct normative expectations towards smoking.

For more than 40 years prevention programs have been implemented and evaluated within the school setting. However, the empirical evidence of the efficacy of these approaches is not yet uniquely convincing.<sup>7-12</sup> A recent Cochrane review on the effects of school-based smoking prevention trials<sup>13</sup> selected randomized controlled trials where students, classes, schools, or school districts were randomized to intervention arm(s) versus a control group, and followed-up for at least six months. One hundred and thirty-four studies involving 428,293 participants met the inclusion criteria of the review which revealed an overall significant intervention effect on the onset of smoking at longest follow-up, while there was no overall effect at follow-ups at one year or less. When analyzing intervention effects not only on smoking behavior, but also on further outcomes addressed directly or indirectly by school-based interventions like attitudes towards smoking, resistance skills or smoking



1  
2  
3 related knowledge, findings might be condensed into a more or less consistent pattern with  
4 medium effects being found for knowledge and, if any, small effects for attitudes, skills and  
5 use.<sup>14-16</sup>  
6  
7

8  
9 Among altogether 37 trials on smoking prevention strategies from the time period 2001 to  
10 2006 which were included in a Health Technology Assessment, only one study originated  
11 from Germany.<sup>17</sup> The Cochrane Review<sup>13</sup> which covers publications until 2012 included  
12 another five studies from Germany, three of them were trials being published until 2000, and  
13 two trials being published after 2006 (one of these was a multi-center study with one out of  
14 seven centers being located in Germany). Most of these studies had some methodological  
15 shortcomings like not adjusting for the clustering of data which results from the specific  
16 characteristics of the setting with delivery of the intervention to complete classes, and  
17 schools or classes instead of individuals being the unit of randomization. Therefore, a lack of  
18 rigorous evaluation trials on smoking prevention programs can be inferred especially for  
19 Germany.  
20  
21  
22  
23  
24  
25  
26

27 The present study aims to contribute to overcome shortcomings in the evidence for the  
28 efficacy of school-based smoking prevention by presenting results of a cluster randomized  
29 trial from Germany. We report findings on the 6-month follow-up effects of a school-based  
30 curriculum named “Eigenständig werden 5+6” (“Becoming independent 5+6”) for students in  
31 grade five and six when they are about 10 to 12 years old. The overall aim of “Eigenständig  
32 werden 5+6” is the prevention of substance use and abuse by increasing substance specific  
33 skills and general life skills of students. Findings presented herein refer to effects of program  
34 participation on smoking related knowledge, attitudes towards smoking, perceived norms of  
35 smoking, self-efficacy to resist cigarette offers and actual smoking behavior six months after  
36 the implementation over two school-years has ended, i.e. on average 26 months after  
37 baseline.  
38  
39  
40  
41  
42  
43  
44  
45  
46  
47

## 48 **METHODS**

### 49 **Intervention**

50 “Eigenständig werden 5+6” is a school-based prevention program for students in grade five  
51 and six which takes quality criteria of effective prevention programs into account.<sup>8,9,18,19</sup>  
52

53 Based on the life skills approach and on the social influence model, “Eigenständig werden  
54 5+6” aims primarily at the prevention of substance use (i.e. tobacco smoking and drinking  
55 alcohol) by increasing general life skills as well as substance specific skills (i.e. coping with  
56  
57  
58  
59  
60

1  
2  
3 emotions, stress, problems, pressures to smoke and drink alcohol, increase of refusal skills  
4 and decrease of susceptibility to pro-smoking and pro-alcohol social influences).  
5  
6 The program delivers the contents in 14 units (most of them lasting 90 minutes) and in two  
7 workshops (four to six class hours) that are evenly distributed over the grades five and six. In  
8 detail, each lesson covers a specific topic, for instance problem solving, critical thinking,  
9 effective communication skills, decision-making, interpersonal relationship skills, self-  
10 awareness building skills, empathy, coping with stress, and emotions as well as the student's  
11 ability to work in a group. The two workshops include several activities about smoking  
12 cigarettes and alcohol misuse, and are designed as a student's course with nine challenging  
13 stations that either address different aspects of smoking cigarettes or aspects of alcohol  
14 misuse. Stations concerning the first workshop, smoking cigarettes, cover risks and  
15 disadvantages of smoking, smoking related knowledge, perceived norms, and self-efficacy to  
16 refuse a cigarette offers as well as strategies of advertisement and industry. The stations of  
17 the second workshop deal with the same issues, but tailored to the topic of alcohol misuse.  
18 All components are realized by trained teachers within daily school-routine. Further details on  
19 the program have been described elsewhere.<sup>20</sup>  
20  
21  
22  
23  
24  
25  
26  
27  
28

### 29 **Design**

30 A five-wave cluster randomized-controlled trial with two arms (intervention and control  
31 condition) is being conducted in four German federal states (Bremen, Hesse, North Rhine-  
32 Westphalia and Schleswig-Holstein) to evaluate the effects of "Eigenständig werden 5+6".  
33 The randomization occurred at school level to avoid information exchange between  
34 conditions in the school. For randomization, schools were stratified according to the following  
35 criteria: (1) study region, (2) type of school, (3) number of fifth grade classes per school.  
36 According to these strata, schools were randomly assigned to the two arms of the study with  
37 a 50 per cent chance of being allocated to either group by using coin toss method.  
38 Intervention group took part in "Eigenständig werden 5+6" and is compared to control group  
39 receiving education as usual, i.e. lessons and subjects following the standard school  
40 curriculum without specific interventions to foster life skills or to prevent smoking. Baseline  
41 assessment took place prior to the intervention in October/November 2010, post-tests were  
42 realized in June/July 2011 and June/July 2012, a 6-month follow-up was being conducted in  
43 December 2012 and a 15-month follow-up will take place in September/October 2013. For  
44 further details, see Hansen et al.<sup>20</sup>  
45  
46  
47  
48  
49  
50  
51  
52  
53  
54

### 55 **Study Sample**

56 A priori sample size determination assuming a significance level of  $\alpha=0.05$ , power=0.80, a  
57 15% prevention effect, an average cluster size of 20 students per class, an intra class  
58  
59  
60

1  
2  
3 correlation of 0.02 and a drop-out rate of 25% revealed a recommended sample size of 158  
4 classes and 3,160 students at baseline (for detailed description of sample size determination  
5 see<sup>20</sup>). To recruit the sample, complete lists of all secondary schools of selected regions  
6 were obtained from the Ministries of Education of each federal state. An overall of 450  
7 secondary schools in the study regions were invited to participate in the study, of which 323  
8 (71.5%) did neither express approval or disapproval (Figure 1). The decision to participate in  
9 the study was expressed by 48 schools (11%) with 191 classes and 4,772 students. Of these  
10 48 schools agreeing to participate, 26 schools with 97 classes and 2,437 students were  
11 allocated to the intervention group whereas 22 schools with 94 classes and 2,335 students  
12 were assigned to the control condition. After randomization, three schools of the intervention  
13 group withdrew their consent as well as four teachers of intervention classes refused to take  
14 part.  
15  
16  
17  
18  
19  
20  
21

22  
23 Consequently, baseline data comprise 45 schools, 172 classes and 3,444 students with a  
24 mean age of 10.37 years (SD=0.59), 47.9% girls; with 1,685 students in 81 classes in the  
25 intervention and 1,759 students in 91 classes in the control condition. In respect to different  
26 outcome and covariate characteristics, intervention and control students were extensively  
27 comparable with the exception of a higher proportion of students of Gymnasiums in the  
28 control condition (for detailed baseline sample description see<sup>20</sup>). Data presented herein refer  
29 to the baseline (October 2010) and 6-month follow-up survey (December 2012). It was  
30 possible to merge follow-up data of 1,255 students in the intervention arm and 1,438  
31 students in the control arm (total N=2,693, 78.2% of N=3,444) to baseline data. For analysis,  
32 data sets with inconsistencies concerning age, gender, and smoking status were excluded  
33 (N=180). The final analysis sample consists of 2,513 data sets (intervention group: N=1,179,  
34 control group: N=1,334). Mean age at follow-up was 12.50 years (SD=0.58).  
35  
36  
37  
38  
39  
40  
41  
42

43 - Insert Figure 1 about here -  
44  
45

## 46 Measures

47 Data were collected through self-completed anonymous questionnaires by teachers and  
48 students. The development of the questionnaire and a complete list of variables and  
49 constructs assessed in the trial have been documented.<sup>20</sup> Analyses presented herein, rely on  
50 the following outcome measures: *Lifetime tobacco smoking* experience was assessed by  
51 asking how many cigarettes have ever been smoked in life. Nine answering categories  
52 ('none', 'only a few puffs', '1 cigarette', '2 cigarettes', '3-4 cigarettes', '5-9 cigarettes', '10-19  
53 cigarettes', '20-100 cigarettes', '>100 cigarettes') were provided. Students having smoked at  
54 least a few puffs were considered as ever smokers. *Smoking incidence* at follow-up among  
55  
56  
57  
58  
59  
60

1  
2  
3 baseline never smokers was determined by combining the answers to lifetime smoking at  
4 baseline and follow-up: those who had never smoked at baseline, and indicated any smoking  
5 by the follow-up survey, even just a few puffs, were considered as having initiated smoking  
6 during the observation period. *Current smoking* frequency was measured by asking how  
7 many cigarettes are currently smoked. Respondents could answer 'I don't smoke,' 'less than  
8 once a month', 'at least once a month, but not weekly', 'at least once a week, but not daily,'  
9 or 'daily'. Responses were dichotomized into students not smoking and students indicating  
10 any kind of current smoking.  
11  
12  
13  
14

15  
16 To assess *attitudes towards smoking and risk perception*, respondents should rate eleven  
17 statements (e.g. 'Non-smokers are fitter', 'Non-smokers are cooler', 'If I smoke during the  
18 next month, I will get in trouble with my friends'). Answer categories comprise 0='not true',  
19 1='somewhat true', 2='rather true', and 3='totally true', i.e. higher values represent a more  
20 negative attitude towards smoking and more sensitive perception of risk. Cronbach's Alpha  
21 of this scale was 0.80. A change in attitude from baseline to follow-up was determined by  
22 subtracting the baseline value from the follow-up value for each respondent. *Smoking related*  
23 *knowledge* was tested through seven statements (e.g. 'Cigarettes contain arsenic which is  
24 also found in rat poison.') to which respondents could either agree by answering 'true' or  
25 disagree by stating 'wrong' or state 'I don't know'. As indicator of knowledge, the percentage  
26 of correct classifications of statements was determined. An increase in knowledge from  
27 baseline to follow-up was determined by subtracting the baseline value from the follow-up  
28 value for each respondent. *Normative expectations* were measured on an 11-point scale  
29 ranging from 0='nobody' to 10='everybody' on which students had to estimate how many a)  
30 'Adults in Germany' and b) 'Adolescents at their age' in Germany smoke. *Self-efficacy* to  
31 refuse cigarette offers were assessed by asking 'To what extent do you dare to refuse  
32 cigarettes, even if your friends laugh at you or suspend you on that account?' with answer  
33 categories ranging from 0='not at all' to 3='totally'. Normative expectations and self-efficacy  
34 were analyzed on single item level.  
35  
36  
37  
38  
39  
40  
41  
42  
43  
44  
45  
46

47 *Covariate measures* were derived from studies that focused on risk factors of adolescent  
48 tobacco use, to control for confounding variables that would be theoretically related to the  
49 smoking measures.<sup>21-23</sup> Sociodemographics include age, gender, type of school (Gymnasium  
50 vs. other type of school), migration background (mother and/or father were born outside  
51 Germany) and socio-economic status (SES, Family Affluence Scale<sup>24</sup>). As personal  
52 characteristics, rebelliousness and sensation-seeking were assessed with two items in each  
53 case.<sup>25,26</sup> Parent, sibling and peer smoking were assessed as factors from social  
54 environment (no vs. any parent/sibling/peer smoking). Finally, students were asked whether  
55  
56  
57  
58  
59  
60

1  
2  
3 they had participated in a comprehensive prevention program in elementary school with  
4 examples of most broadly disseminated programs given.  
5  
6

### 7 8 **Procedure**

9 In schools having agreed to participate, teachers of the respective fifth grade collected the  
10 parental informed consent. Students with refusal were excluded from all assessments. Data  
11 assessment was conducted in the class room and lasted 45 minutes. Research staff was  
12 responsible for the distribution, help in completion and collection of the questionnaire. To  
13 permit a linking of individual baseline and follow-up data while assuring anonymity, students  
14 generated a seven digit individual code. This procedure has been tested and used in several  
15 studies and therefore been inspected and approved by Ethics Committee, data protection  
16 and Ministries of Education repeatedly.<sup>27</sup> Teachers were not involved in the data  
17 assessment. At the end of the assessment, all questionnaires were placed in an envelope  
18 which was sealed in front of the class. Therefore, every student was assured that neither  
19 teachers nor parents were able to see the completed questionnaire.  
20  
21  
22  
23  
24  
25  
26

27 Ethical approval for the trial was gained from the Ethics Committee of Medical Faculty of the  
28 University of Kiel. Additional approvals (e.g., from ministries of education, and parents) were  
29 sought as required.  
30  
31  
32

### 33 **Analyses**

34 Predictors of attrition were examined by multilevel mixed effect logistic regressions. To test  
35 for selective attrition, interaction effects for group condition and dependent variable were  
36 tested. Descriptive statistics (percentages, means, standard deviations) are crude values. To  
37 analyze the effects of the intervention on smoking behavior as well as on attitudes and  
38 knowledge, multilevel mixed effect regression models using Stata *mixed* and *meqrlogit*  
39 command were conducted, adjusting for covariates. In case of dichotomous outcomes, effect  
40 sizes (Cohen's d) were determined by using the converting formula proposed by Borenstein  
41 et al.<sup>28</sup> Effect sizes for metric outcomes were calculated as proposed by Feingold.<sup>29</sup> All data  
42 analyses were conducted with Stata V.13.<sup>30</sup>  
43  
44  
45  
46  
47  
48  
49

## 50 **RESULTS**

### 51 **Attrition analysis**

52 Among the 3,444 students assessed at baseline, there were no data available in the analysis  
53 sample for 931 students (27.0%). Overall, significantly higher attrition was found for male  
54 students (31.2%;  $p<0.001$ ), students with a migration background (36.5%;  $p<0.001$ ), students  
55 indicating current smoking (45.7%;  $p=0.047$ ) or current use of alcohol (39.8%;  $p<0.001$ ) at  
56  
57  
58  
59  
60

1  
2  
3 baseline. Furthermore, students dropping out of the study were older than students in the  
4 retention sample ( $M_{\text{attrition}}=10.5$  vs.  $M_{\text{retention}}=10.3$  years of age at baseline;  $p=0.003$ ). Besides  
5 these overall effects, no hints for selective attrition were found, i.e. the associations between  
6 variables listed above and attrition did not differ systematically between the intervention and  
7 control group.  
8  
9

### 10 11 **Effects on smoking behavior**

12 Students in the intervention and control group did not differ in rates for lifetime and current  
13 smoking at baseline. At follow-up, 16.0% of intervention students indicated that they had ever  
14 smoked in their lives compared to 20.2% in the control students (Figure 2). This difference  
15 was statistically significant also after controlling for confounding factors (adjusted Odds Ratio  
16 [OR]=0.63; 95% confidence interval [CI]=[0.41; 0.96];  $p=0.026$ ).  
17  
18

19 While about 1% of intervention and control students reported current smoking at baseline,  
20 these rates increased to more than 5% at follow-up both in intervention and control group.  
21 Therefore, no group differences could be found in the frequency of current smoking.  
22  
23

24 At baseline, 95.6% of the sample were never-smokers ( $N=2,403$ ; intervention group: 96.4%,  
25 control group: 94.9%). Among these baseline never-smokers, 15.5% initiated smoking during  
26 the observation period. The incidence rate was significantly lower in intervention students,  
27 among whom 13.7% reported the first use of cigarettes between baseline and follow-up,  
28 compared to the control group with an incidence rate of 17.1% (adjusted OR=0.66, 95%  
29 CI=[0.43; 1.00],  $p=0.047$ ).  
30  
31  
32  
33  
34  
35  
36  
37  
38

39 - insert Figure 2 about here -  
40  
41

### 42 **Effects on smoking related knowledge and attitudes**

43 Students of both groups showed about the same level of smoking related knowledge at  
44 baseline with correct answering rates of about 30% (Table 1). At follow-up, students in both  
45 groups scored better in the knowledge test: intervention students had a mean percentage of  
46 correct answers of 46.75, while the control students rated on average 37.74% of the  
47 statements correctly. The increase in knowledge was significantly higher in the intervention  
48 group (adjusted  $\beta=9.38$ ; 95% CI=[6.73; 12.04];  $p<0.001$ ).  
49  
50  
51  
52  
53

54 - insert Table 1 about here -  
55  
56  
57  
58  
59  
60

1  
2  
3 A comparable pattern was found for attitudes towards smoking: At baseline, both groups did  
4 not differ in their attitudes and showed a rather critical perception of smoking with a mean  
5 score of 2.04 on the scale ranging from 0 to 3 (Table 1). At follow-up, students rated smoking  
6 even more negatively with a mean score of 2.24 in the intervention and 2.16 in the control  
7 group. Compared to the control group, this change in attitudes was more pronounced in the  
8 intervention group (adjusted  $\beta=0.10$ ; 95% CI=[0.03; 0.16];  $p=0.002$ ).  
9  
10  
11

12  
13 Normative expectations were hardly influenced by the intervention: While intervention  
14 students estimated smoking prevalence in adults marginally lower at follow-up compared to  
15 their estimation at baseline, a small increase in this estimate could be observed in control  
16 students (Table 1). For peer smoking, both groups showed a small increase in perceived  
17 frequency of smoking. None of these changes turned out to be statistically significant after  
18 covariates and baseline estimates were controlled for.  
19  
20  
21  
22  
23

24 Already at baseline, students in both groups considered themselves rather capable to refuse  
25 cigarette offers (Table 1). During the observation period, self-efficacy even grew with a  
26 slightly higher – but statistically insignificant – increase in intervention students compared to  
27 control students.  
28  
29  
30  
31  
32  
33  
34  
35  
36  
37  
38  
39  
40  
41  
42  
43  
44  
45  
46  
47  
48  
49  
50  
51  
52  
53  
54  
55  
56  
57  
58  
59  
60



Table 1.

Descriptive statistics and multilevel mixed effects linear regressions for smoking related knowledge, attitudes, perceived norms and self-efficacy to refuse cigarette offers

|                                                 | Baseline             |               | Follow-up      |               | Change        |              | Difference in change |             |        |
|-------------------------------------------------|----------------------|---------------|----------------|---------------|---------------|--------------|----------------------|-------------|--------|
|                                                 | Beginning of grade 5 |               | Mid of grade 7 |               | Intervention  | Control      | adj. $\beta^1$       | 95% CI      | p      |
|                                                 | Intervention         | Control       | Intervention   | Control       |               |              |                      |             |        |
|                                                 | M (SD)               | M (SD)        | M (SD)         | M (SD)        | M (SD)        | M (SD)       |                      |             |        |
| Knowledge <sup>2</sup>                          | 30.34 (19.47)        | 30.11 (19.14) | 46.75 (21.59)  | 37.74 (20.45) | 16.53 (26.46) | 7.53 (24.13) | 9.38                 | 6.73; 12.04 | <0.001 |
| Attitudes/risk perception <sup>3</sup>          | 2.04 (0.51)          | 2.04 (0.51)   | 2.24 (0.51)    | 2.16 (0.54)   | 0.20 (0.61)   | 0.12 (0.61)  | 0.10                 | 0.03; 0.16  | 0.002  |
| Norms adult smoking <sup>4</sup>                | 6.08 (1.62)          | 5.97 (1.59)   | 6.04 (1.62)    | 6.09 (1.55)   | -0.03 (2.09)  | 0.12 (1.95)  | -0.08                | -0.24; 0.07 | 0.265  |
| Norms peer smoking <sup>4</sup>                 | 3.08 (2.64)          | 2.93 (2.56)   | 4.24 (2.28)    | 4.02 (2.18)   | 1.16 (3.10)   | 1.10 (2.93)  | 0.15                 | -0.13; 0.43 | 0.283  |
| Self-efficacy to refuse cigarettes <sup>5</sup> | 2.38 (1.04)          | 2.36 (1.03)   | 2.53 (0.80)    | 2.49 (0.85)   | 0.15 (1.20)   | 0.11 (1.22)  | 0.07                 | -0.03; 0.17 | 0.140  |

M = Mean, SD = Standard deviation, CI = Confidence interval

<sup>1</sup> Adjusted for age, gender, type of school, socio-economic status, immigration background, peer / parent / sibling smoking, sensation seeking, rebelliousness, earlier participation in a prevention program, baseline value of the respective variable

<sup>2</sup> Mean percentage of correct answers in a 7-item quiz

<sup>3</sup> Range 0 to 3, higher values representing more negative attitude

<sup>4</sup> Range 0 = nobody smokes to 10 = everybody smokes

<sup>5</sup> Range 0-3, higher values representing higher self-efficacy



1  
2  
3 Effect sizes for significant program effects were small to medium with  $d=0.26$  (lifetime  
4 smoking),  $d=0.23$  (incidence of smoking),  $d=0.45$  (smoking related knowledge), and  $d=0.15$   
5 (attitudes/risk perception).  
6  
7

### 8 9 **Sensitivity analyses**

10 Since a substantial proportion of cases was excluded from the analysis sample due to  
11 inconsistent data ( $N=180$ ) or as they were lost to follow-up ( $N=931$ ), we conducted some  
12 sensitivity analyses to estimate the risk that the findings might be biased by these exclusions.  
13 First, we reran the analyses with inconsistent cases left in the dataset. This re-inclusion of  
14 inconsistent cases hardly changed the results for metric outcomes with significant effects for  
15 knowledge and attitudes and slightly changed results for smoking behavior with marginally  
16 significant associations for lifetime smoking ( $p=0.086$ ) and incidence ( $p=0.083$ ). To address  
17 the restriction of sample to complete cases, predictors for higher attrition were used as guide  
18 to create subsamples. As the attrition rate was highest in baseline current smokers and  
19 therefore this (small) subgroup of students smoking already very early might differ  
20 substantially from the majority of non-smoking students, we excluded baseline current  
21 smokers ( $N=25$ ) completely. For this subsample, we found the same significant effects for  
22 lifetime smoking ( $p=0.030$ ), knowledge ( $p<0.001$ ) and attitudes ( $p=0.002$ ) and no effects on  
23 current smoking, norms and self-efficacy. Further factors being associated with a higher risk  
24 of attrition (male gender, higher age, migration background) were explored by analyzing  
25 subsamples of male students, students aged  $\geq 11$  years at baseline and students with  
26 migration background. In these subsamples, incidence rates in control students exceeded  
27 those of intervention by 4 to 7 percent points (reaching significance for older students,  
28  $p=0.026$ , marginal significance for students with migration background,  $p=0.061$ , and failing  
29 to reach significance for male students,  $p=0.225$ ).  
30  
31  
32  
33  
34  
35  
36  
37  
38  
39  
40  
41

### 42 43 **DISCUSSION**

44 The current study aimed to investigate the effects of a school-based prevention program on  
45 smoking related knowledge, attitudes and behavior six months after the end of program  
46 implementation. Using a cluster randomized controlled design, findings revealed that the  
47 program participation seems to reduce the prevalence and incidence of lifetime smoking, to  
48 increase smoking related knowledge, and to influence attitudes and perceived risks of  
49 smoking towards a more critical perception. Program effects on the prevalence of current  
50 smoking, normative expectations or refusal skills could not be determined. Using Cohen's  
51 classification of effect sizes,<sup>31</sup> effect size was small for smoking behavior and attitudes, while  
52 there was a medium effect on smoking related knowledge.  
53  
54  
55  
56  
57  
58  
59  
60

1  
2  
3 The pattern found for effects on smoking behavior with significant small effects on smoking  
4 incidence ( $d=0.23$ ) and lifetime smoking ( $d=0.26$ ), and no effect on current smoking can be  
5 aligned quite well with the results presented in former meta-analyses: The pooled odds ratio  
6 of 0.88 for smoking onset at the longest follow-up revealed by the overall analysis of Thomas  
7 et al.<sup>13</sup> corresponds to an effect size of  $d=0.07$ , while their subgroup analyses for different  
8 intervention approaches provided even moderate effect sizes (odds ratios between 0.49 and  
9 0.52 corresponding to  $d$ 's between 0.36 and 0.39). Earlier meta-analyses on school-based  
10 drug prevention programs,<sup>14</sup> psychosocial smoking prevention programs<sup>15</sup> or studies on  
11 Project DARE (Drug Abuse Resistance Education),<sup>16</sup> the most widely used school-based  
12 drug prevention program in the United States and focusing on teaching skills to recognize  
13 and resist social pressure, also determined small program effects on substance use with  $d$ 's  
14 ranging between 0.08 and 0.18. Finding no effect on current smoking might also be  
15 explained to some extent by the young age of the sample with only very few students  
16 smoking already on a regular basis.  
17  
18  
19  
20  
21  
22  
23  
24

25  
26 The participation in "Eigenständig werden 5+6" significantly increased smoking related  
27 knowledge with an effect size of  $d=0.45$  – the highest effect found in our analyses. This  
28 medium effect is in line with effect sizes ranging from 0.36 to 0.42 determined in meta-  
29 analyses referred to above.<sup>14-16</sup> Attitudes were influenced also significantly by the  
30 intervention, the small effect ( $d=0.15$ ) compares well with the small effects in a range from  
31 0.11 to 0.26 having been reported.<sup>14-16</sup>  
32  
33  
34  
35

36 We were not able to show an effect of the intervention in correcting perceived norms of  
37 smoking or in enhancing self-efficacy to refuse offered cigarettes. Students of both  
38 intervention and control group consider themselves to be rather highly self-efficacious to  
39 resist to cigarette offers already at the outset of the study and this rating even increases in  
40 both groups at follow-up, i.e. a ceiling effect might decrease the discriminative power of the  
41 group comparisons. As far as perceived norms of smoking are concerned, a possible  
42 explanation of the null-effect is the fact that only a minor part of the intervention (one subtask  
43 among nine tasks of the smoking workshop at the end of grade 5) deals with the topic of  
44 norms. Most tasks in the workshop address facts about and visualization of the short- and  
45 long-term consequences of smoking, others aim to scrutinize strategies of the tobacco  
46 industry or to foster resistance skills.  
47  
48  
49  
50  
51  
52  
53

54 Some limitations of the current study have to be considered: During the 26 month period  
55 from baseline to follow-up, there has been some drop-out from the study. The analysis  
56 sample ( $N=2,513$ ) amounted to 73.0% of the baseline sample ( $N=3,444$ ). This drop-out was  
57  
58  
59  
60

1  
2  
3 slightly higher than expected in the a priori power calculation (25%), but since the baseline  
4 sample was somewhat larger than calculated (N=3,444 instead of N=3,160), the analysis  
5 sample still exceeds the estimated sample at follow-up (75% of 3,160 = 2,370). Therefore,  
6 the power of the analyses should be adequate. Furthermore, we did not find any hints for  
7 selective attrition which could restrict the validity of findings and sensitivity analyses revealed  
8 very comparable patterns of results in subsamples with higher risk for attrition and smoking.  
9 The curriculum "Eigenständig werden 5+6" comprises of 14 lessons à on average 90 minutes  
10 and two workshops with 4 to 6 hours of duration which are implemented by teachers in  
11 addition to usual education, i.e. the program is quite time-consuming, it requires some  
12 dedication by teachers and it seems unreasonable to assume that the intervention is  
13 delivered to all classes exactly in the way and to the extent foreseen by the manual. The  
14 analyses in this report were not controlled for treatment integrity,<sup>32,33</sup> i.e. classes with low  
15 treatment fidelity that have only been exposed to parts of the intervention contribute to the  
16 same extent to the results of the intervention group as classes with complete program  
17 implementation. Therefore, results can be considered as rather conservative. Another  
18 limitation is the reliance on self-reports in the assessment of outcomes. Especially for  
19 outcomes assessing smoking behavior, but also for attitudes towards smoking, answers  
20 might be biased by social desirability. These influences might occur more likely in the  
21 intervention group since students might be primed by the intervention that smoking is an  
22 "unwanted" behavior. Nevertheless, since purchase of cigarettes and smoking in public is  
23 forbidden by law for minors in Germany, students in the control condition are not free of a  
24 social desirability bias as well. For other outcomes like the assessment of refusal skills,  
25 validity of self-report data might be limited by restricted accessibility, i.e. whether adolescents  
26 are really able to judge their own competence to resist cigarette offers. Finally, the study was  
27 run in regular public schools of four federal states of Germany, i.e. the generalizability might  
28 be limited due to these regional constraints and restricted to adolescents visiting regular  
29 schools.  
30  
31  
32  
33  
34  
35  
36  
37  
38  
39  
40  
41  
42  
43  
44

45  
46 On the other hand, some strengths of the current study should be born in mind: Results were  
47 derived from a cluster randomized controlled trial, applying sophisticated statistical methods,  
48 comprising a range of several outcomes and following students up for six months after the  
49 end of intervention. Therefore, we implemented rather rigorous evaluation methods, which  
50 are in line with recommendations like those of the Society for Prevention Research.<sup>34</sup>  
51  
52  
53  
54

55 Perspectives and open questions for future research might be the following: In the current  
56 trial, a further follow-up at 15 months after end of intervention is being conducted to explore  
57 stability of effects in the longer term. Furthermore, exploring effects on other outcomes than  
58  
59  
60

1  
2  
3 smoking, e.g. alcohol use or life skills, is owing for the current study. On the basis of findings  
4 for efficacy, effectiveness in relation to costs as well as generalizability to other populations  
5 should be investigated. Finally, besides stating whether an intervention is effective or not,  
6 mechanisms by which shown effects can be explained theoretically and empirically are to be  
7 explored. These mediation analyses may contribute to investigate causal models for  
8 preventive intervention, e.g. to explore whether knowledge or change in attitude are  
9 necessary preconditions for behavior change.<sup>14</sup>  
10  
11  
12  
13  
14  
15  
16  
17  
18  
19  
20  
21  
22  
23  
24  
25  
26  
27  
28  
29  
30  
31  
32  
33  
34  
35  
36  
37  
38  
39  
40  
41  
42  
43  
44  
45  
46  
47  
48  
49  
50  
51  
52  
53  
54  
55  
56  
57  
58  
59  
60

For peer review only

**Figure legends**

Figure 1. Participation flowchart

Figure 2. Percentage of lifetime smoking, current smoking at baseline and 6-month follow-up, percentage of smoking incidence at 6-month follow-up among baseline never-smokers, and multilevel mixed effects logistic regressions; OR = odds ratio, CI = confidence interval; logistic regressions were adjusted for age, gender, type of school, socio-economic status, immigration background, peer / parent / sibling smoking, sensation seeking, rebelliousness, earlier participation in a prevention program

For peer review only

## Acknowledgements

Marianne Bayrhuber contributed to the completion of the project by organizing the data assessments. Maja Hornberger, Gudrun Wiborg, Birte Walther, Hinnerk Frahm and Heike Kühl-Frese were involved in the development of the prevention program. Malin Bachmann, Tina Basner, Jana Blumkowski, Dorothea Breckwoldt, Roxana Buzila, Svenja Cleve, Malte Dincher, Eva-Maria Eggers, Nadia El Bouhayati, Almut Engelhardt, Sigrid Feierabend, Sarah Göhlert, Lars Grabbe, Judith Hanewinkel, Oksana Herdt, Semiha Idrizovic, Sabiha Izaamriouane, Martin Karsten, Andre Lischick, Stefanie Otte, Serdar Peker, Ines Pohlmann, Wiebke Pustal, Gesa Sander, Christoph Schlüter, Björn Seiler, Beate Steiber, Alexander Wierzock and Nicole Wilmes assessed the data.

We would like to thank our partners: Institut für Qualitätsentwicklung an Schulen Schleswig-Holstein, Landesinstitut für Schule Bremen, Krisenhilfe Bochum, Fachstelle für Suchtprävention im Wetteraukreis, Fachstelle für Suchtprävention des Zweckverbandes der Diakonie Bad Hersfeld, Diakonie Herford, Koordinationsstelle Schulische Suchtvorbeugung, Fachstelle für Suchtvorbeugung Dortmund, Hessische Landesstelle für Suchtfragen, Ginko Stiftung für Prävention, and all schools that participated in the study.

## Funding

This work was supported by German Cancer Aid (Grant Number: 108374).

## Competing interests

None.

## Ethics approval

Ethics approval was provided by the Ethics Committee of the Medical Faculty of the University of Kiel (Ref.: D 419/10).

## Contributors

BI performed the statistical analysis and interpretation of the data and drafted the manuscript. JH contributed to the acquisition of the data and participated in drafting the manuscript. KM contributed to the acquisition and management of the data. RH as principle investigator is responsible for the study concept, design and supervision and helped in drafting the manuscript.

All authors had full access to all of the data in the study and take responsibility for the integrity of the data and the accuracy of the data analysis. All authors conducted a critical revision of the article and granted final approval of the article for important intellectual content.

1  
2  
3  
4  
5  
6  
7  
8  
9  
10  
11  
12  
13  
14  
15  
16  
17  
18  
19  
20  
21  
22  
23  
24  
25  
26  
27  
28  
29  
30  
31  
32  
33  
34  
35  
36  
37  
38  
39  
40  
41  
42  
43  
44  
45  
46  
47  
48  
49  
50  
51  
52  
53  
54  
55  
56  
57  
58  
59  
60

**Data sharing statement**

No additional data available.

For peer review only

## References

- (1) Lim SS, Vos T, Flaxman AD, et al. A comparative risk assessment of burden of disease and injury attributable to 67 risk factors and risk factor clusters in 21 regions, 1990-2010: a systematic analysis for the Global Burden of Disease Study 2010. *Lancet* 2013; 380(9859):2224-2260.
- (2) Bundeszentrale für gesundheitliche Aufklärung. Der Tabakkonsum Jugendlicher und junger Erwachsener in Deutschland 2012. Ergebnisse einer aktuellen Repräsentativbefragung und Trends. Köln: Bundeszentrale für gesundheitliche Aufklärung; 2013.
- (3) Robert Koch-Institut. Die Gesundheit von Kindern und Jugendlichen in Deutschland. Berlin: Robert Koch-Institut; 2013.
- (4) World Health Organisation. Life skills education in schools, parts 1 and 2. Geneva: WHO, Division of Mental Health; 1994.
- (5) Evans RI. Smoking in children: developing a social psychological strategy of deterrence. *Prev Med* 1976; 51:122-127.
- (6) Donaldson SI, Graham JW, Hansen WB. Testing the generalizability of intervening mechanism theories: understanding the effects of adolescent drug use prevention interventions. *J Behav Med* 1994; 17(2):195-216.
- (7) Flay BR. The promise of long-term effectiveness of school-based smoking prevention programs: a critical review of reviews. *Tob Induc Dis* 2009; 5(1):7.
- (8) Cuijpers P. Effective ingredients of school-based drug prevention programs. A systematic review. *Addict Behav* 2002; 27(6):1009-1023.
- (9) Gottfredson DC, Wilson DB. Characteristics of effective school-based substance abuse prevention. *Prev Sci* 2003; 4(1):27-38.
- (10) Flay BR. School-based smoking prevention programs with the promise of long-term effects. *Tob Induc Dis* 2009; 5(1):6.
- (11) Skara S, Sussman S. A review of 25 long-term adolescent tobacco and other drug use prevention program evaluations. *Prev Med* 2003; 37(5):451-474.
- (12) Wiehe SE, Garrison MM, Christakis DA, et al. A systematic review of school-based smoking prevention trials with long-term follow-up. *J Adolesc Health* 2005; 36(3):162-169.
- (13) Thomas RE, McLellan J, Perera R. School-based programmes for preventing smoking. *Cochrane Database Syst Rev* 2013; 4:CD001293.
- (14) Tobler NS, Stratton HH. Effectiveness of school-based drug prevention programs: a meta-analysis of the research. *J Prim Prev* 1997; 18(1):71-128.



- 1  
2  
3 (15) Hwang MS, Yeagley KL, Petosa R. A meta-analysis of adolescent psychosocial  
4 smoking prevention programs published between 1978 and 1997 in the United  
5 States. *Health Educ Behav* 2004; 31(6):702-719.  
6  
7 (16) Ennett ST, Tobler NS, Ringwalt CL, et al. How effective is drug abuse resistance  
8 education? A meta-analysis of Project DARE outcome evaluations. *Am J Public*  
9 *Health* 1994; 84(9):1394-1401.  
10  
11 (17) Müller-Riemenschneider F, Rasch A, Bockelbrink A, et al. Effectiveness and cost-  
12 effectiveness of behavioural strategies in the prevention of cigarette smoking. *GMS*  
13 *Health Technol Assess* 2008; 4:Doc10.  
14  
15 (18) Cuijpers P. Three decades of drug prevention research. *Drug Educ Prev Polic* 2003;  
16 10(1):7-20.  
17  
18 (19) Hansen WB, Dusenbury L, Bishop D, et al. Substance abuse prevention program  
19 content: systematizing the classification of what programs target for change. *Health*  
20 *Educ Res* 2007; 22(3):351-360.  
21  
22 (20) Hansen J, Hanewinkel R, Maruska K, et al. The 'Eigenständig werden' prevention  
23 trial: a cluster randomised controlled study on a school-based life skills programme to  
24 prevent substance use onset. *BMJ Open* 2011; 1(2):e000352.  
25  
26 (21) Gibbons FX, Gerrard M. Predicting young adults' health risk behavior. *J Pers Soc*  
27 *Psychol* 1995; 69(3):505-517.  
28  
29 (22) Hawkins JD, Catalano RF, Miller JY. Risk and protective factors for alcohol and other  
30 drug problems in adolescence and early adulthood: implications for substance abuse  
31 prevention. *Psychol Bull* 1992; 112(1):64-105.  
32  
33 (23) Petraitis J, Flay BR, Miller TQ. Reviewing theories of adolescent substance use:  
34 organizing pieces in the puzzle. *Psychol Bull* 1995; 117(1):67-86.  
35  
36 (24) Currie C, Molcho M, Boyce W, et al. Researching health inequalities in adolescents:  
37 the development of the Health Behaviour in School-Aged Children (HBSC) family  
38 affluence scale. *Soc Sci Med* 2008; 66(6):1429-1436.  
39  
40 (25) Stephenson MT, Hoyle RH, Palmgreen P, et al. Brief measures of sensation seeking  
41 for screening and large-scale surveys. *Drug Alcohol Depend* 2003; 72(3):279-286.  
42  
43 (26) Burt RD, Dinh KT, Peterson Jr AV, et al. Predicting adolescent smoking: a  
44 prospective study of personality variables. *Prev Med* 2000; 30(2):115-125.  
45  
46 (27) Galanti MR, Siliquini R, Cuomo L, et al. Testing anonymous link procedures for  
47 follow-up of adolescents in a school-based trial: The EU-DAP pilot study. *Prev Med*  
48 2007; 44(2):174-177.  
49  
50 (28) Borenstein M, Hedges LV, Higgins JPT, et al; Introduction to meta-analysis.  
51 Chichester: Jon Wiley & Sons; 2009.  
52  
53 (29) Feingold A. Effect sizes for growth-modeling analysis for controlled clinical trials in the  
54 same metric as for classical analysis. *Psychol Methods* 2009; 14(1):43-53.  
55  
56 (30) StataCorp. Stata Statistical Software: Release 13. College Stations, Texas:  
57 StataCorp; 2013.  
58  
59  
60

- 1  
2  
3 (31) Cohen J. Statistical power analyses for behavioral science. Hilldale, New York:  
4 Erlbaum; 1988.  
5  
6 (32) Bishop DC, Pankratz MM, Hansen WB, et al. Measuring Fidelity and Adaptation:  
7 Reliability of a Instrument for School-Based Prevention Programs. *Eval Health Prof*  
8 2013.  
9  
10 (33) Dusenbury L, Brannigan R, Falco M, et al. A review of research on fidelity of  
11 implementation: implications for drug abuse prevention in school settings. *Health*  
12 *Educ Res* 2003; 18(2):237-256.  
13  
14 (34) Flay BR, Biglan A, Boruch RF, et al. Standards of evidence: criteria for efficacy,  
15 effectiveness and dissemination. *Prev Sci* 2005; 6(3):151-175.  
16  
17  
18  
19  
20  
21  
22  
23  
24  
25  
26  
27  
28  
29  
30  
31  
32  
33  
34  
35  
36  
37  
38  
39  
40  
41  
42  
43  
44  
45  
46  
47  
48  
49  
50  
51  
52  
53  
54  
55  
56  
57  
58  
59  
60

1  
2  
3  
4  
5  
6  
7  
8  
9  
10  
11  
12  
13  
14  
15  
16  
17  
18  
19  
20  
21  
22  
23  
24  
25  
26  
27  
28  
29  
30  
31  
32  
33  
34  
35  
36  
37  
38  
39  
40  
41  
42  
43  
44  
45  
46  
47  
48  
49  
50  
51  
52  
53  
54  
55  
56  
57  
58  
59  
60

Effects of a School-Based Prevention Program on Smoking [in early Adolescence](#): Six-Month Follow-up of the 'Eigenständig werden' Cluster Randomized Trial

Barbara Isensee, Julia Hansen, Karin Maruska, Reiner Hanewinkel  
Institute for Therapy and Health Research (IFT-Nord)  
Harmsstr. 2  
24114 Kiel, Germany

Corresponding Author:

Barbara Isensee

Phone: +49 (0)431 5702930

Fax: +49 (0)431 5702929

Email: [isensee@ift-nord](mailto:isensee@ift-nord)

Key words: smoking; school-based prevention; cluster randomized controlled trial; efficacy

Word count main text: [3,7704.398](#)

## ABSTRACT

**Objectives:** To test the effects of a school-based prevention program on students' smoking related behavior, attitudes and knowledge six months after ~~program~~ implementation over two school-years has ended.

**Design:** Two-arm prospective cluster randomized controlled trial with a follow-up survey six months after end of program implementation, i.e. 26 months after baseline.

**Setting:** Forty-five public secondary schools from four federal states in Germany (Bremen, Hesse, North Rhine-Westphalia, Schleswig-Holstein).

**Participants:** A total of 3,444 students from 172 classes at baseline with a mean age of 10.37 years (SD=0.59) and 47.9% girls at baseline. Analysis sample with follow-up data merged to baseline data comprises 2,513 data sets (73.0%).

**Intervention:** "Eigenständig werden 5+6", a school-based prevention program for grade five and six to enhance substance specific and general life skills, consisting of 14 units (à 90 minutes) and two workshops (4 ~~resp.~~ 6 hours) being taught over a time period of two school- years by trained teachers.

**Outcome measures:** Lifetime and current smoking, incidence of smoking in baseline never smokers, smoking related knowledge, attitudes, perceived norms of smoking, self-efficacy to refuse cigarette offers were assessed in students.

**Results:** Six months after end of program implementation, students of intervention classes showed significantly lower rates for lifetime smoking (adjusted odds ratio [OR]=0.63;95% confidence interval [CI]=[0.41; 0.96];p=0.026) and incidence of smoking (adjusted OR=0.66; 95%CI=[0.43; 1.00];p=0.047), a higher increase of smoking related knowledge (adjusted  $\beta$ =9.38; 95%CI=[6.73; 12.04];p<0.001) and a greater change in attitudes towards a more critical perception of risks and disadvantages of smoking (adjusted  $\beta$ =0.10; 95%CI=[0.03; 0.16];p=0.002). No group differences were found for current smoking, perceived norms of smoking and self-efficacy to refuse cigarette offers.

**Conclusions:** Participation in the school-based prevention program "Eigenständig werden 5+6" may have small effects on smoking behavior and attitudes and a moderate effect on smoking related knowledge.

**Trial registration:** Current Controlled Trials ISRCTN99442407

Word count abstract: 298 words

## ARTICLE SUMMARY

### Article focus

- School-based prevention programs show inconsistent results concerning efficacy and most of evaluation studies were conducted in the US.
- This study investigates the effects of a prevention program implemented in grade-5 and 6 young adolescents in German schools on different outcomes six months after the end of the two school-years lasting program implementation using rigorous evaluation methodology.

### Key messages

- Program participation seems to reduce the prevalence and incidence of lifetime smoking, to increase smoking related knowledge, and to influence attitudes towards a more critical perception of smoking.

### Strengths and limitations of this study

- Findings were retrieved from a cluster randomized controlled trial with a well-powered sample and under usage of sophisticated statistical methods controlling for confounders and taking clustering of data into account.
- Drop out, reliance on self-reports and lack of control for treatment integrity may be limiting factors to this study.

## BACKGROUND

Smoking remains to be the single greatest preventable cause of mortality worldwide, being a major risk factor for a number of life-threatening diseases, including various cancers, cardiovascular diseases and lung diseases.<sup>1</sup> Though reductions in smoking rates in adolescents have been documented for many Western countries including Germany<sup>2</sup> over the last decade, smoking prevention is still a main issue for public health. Most recent data from Germany reveal smoking rates of about 12% for both female and male adolescents aged 12 to 17 years and 6.6% for young adolescents aged 12 to 15 years.<sup>2,3</sup>

Field Code Changed

Field Code Changed

Formatted: Do not check spelling or grammar, Superscript

School programs are often one of the first approaches mentioned in efforts to denormalize tobacco use and to raise awareness of tobacco's hazardous nature. Prominent approaches to prevent smoking in students are the development and improvement of general life skills, as well as the fostering of skills for resisting social influence and substance-specific skills in adolescence. General life skills are considered to empower adolescents in challenging situations and to help them to master life as competent as possible.<sup>4,5</sup> By enhancing these skills, it is assumed to prevent substance use and abuse, since substance use is considered as a dysfunctional strategy to cope with every day challenges and developmental tasks in adolescence. In line with the social influence approach,<sup>5,6</sup> smoking is conceptualized as a result of influences emerging from the adolescent's environment like peers, family, or media by normative processes and/or overt cigarette offers. Therefore, correction of inaccurate norms is one important component of these programs to adjust the often overestimated prevalence of smoking in adolescence towards more conservative and realistic norms.<sup>6,7</sup> Skill training following these approaches is considered to 'inoculate' students against influences encouraging them to smoke, to help them resist temptations from peers to smoke and to correct normative expectations towards smoking.

Field Code Changed

Field Code Changed

Field Code Changed

For more than 40 years prevention programs have been implemented and evaluated within the school setting. However, the empirical evidence of the efficacy of these approaches is not yet uniquely convincing.<sup>7-12,6-14</sup> A recent Cochrane review on the effects of school-based smoking prevention trials<sup>13,12</sup> selected randomized controlled trials where students, classes, schools, or school districts were randomized to intervention arm(s) versus a control group, and followed-up for at least six months. One hundred and thirty-four studies involving 428,293 participants met the inclusion criteria of the review which revealed an overall significant intervention effect on the onset of smoking at longest follow-up, while there was no overall effect at follow-ups at one year or less. When analyzing intervention effects not only on smoking behavior, but also on further outcomes addressed directly or indirectly by school-based interventions like attitudes towards smoking, resistance skills or smoking

Field Code Changed

Field Code Changed

1  
2  
3  
4  
5  
6  
7 related knowledge, findings might be condensed into a more or less consistent pattern with  
8 medium effects being found for knowledge and, if any, small effects for attitudes, skills and  
9 use.<sup>14-16,13-15</sup>

Field Code Changed

10  
11 Among altogether 37 trials on smoking prevention strategies from the time period 2001 to  
12 2006 which were included in a Health Technology Assessment, only one study originated  
13 from Germany.<sup>17,46</sup> The Cochrane Review<sup>13,42</sup> which covers publications until 2012 included  
14 another five studies from Germany, three of them were trials being published until 2000, and  
15 two trials being published after 2006 (one of these was a multi-center study with one out of  
16 seven centers being located in Germany). Most of these studies had some methodological  
17 shortcomings like not adjusting for the clustering of data which results from the specific  
18 characteristics of the setting with delivery of the intervention to complete classes, and  
19 schools or classes instead of individuals being the unit of randomization. Therefore, a lack of  
20 rigorous evaluation trials on smoking prevention programs can be inferred especially for  
21 Germany.  
22  
23  
24  
25  
26  
27

Field Code Changed

Field Code Changed

28 The present study aims to contribute to overcome shortcomings in the evidence for the  
29 efficacy of school-based smoking prevention by presenting results of a cluster randomized  
30 trial from Germany. We report findings on the 6-month follow-up effects of a school-based  
31 curriculum named "Eigenständig werden 5+6" ("Becoming independent 5+6") for students in  
32 grade five and six when they are about 10 to 12 years old. The overall aim of "Eigenständig  
33 werden 5+6" is the prevention of substance use and abuse by increasing substance specific  
34 skills and general life skills of students. Findings presented herein refer to effects of program  
35 participation on smoking related knowledge, attitudes towards smoking, perceived norms of  
36 smoking, self-efficacy to resist cigarette offers and actual smoking behavior six months after  
37 end-of-the program implementation over two school-years has ended, i.e. on average 26  
38 months after baseline.  
39  
40  
41  
42  
43  
44

## 45 METHODS

### 46 Intervention

47 "Eigenständig werden 5+6" is a school-based prevention program for students in grade five  
48 and six which takes quality criteria of effective prevention programs into account.<sup>8,9,18,19,7-9,17,18</sup>  
49 Based on the life skills approach and on the social influence model, "Eigenständig werden  
50 5+6" aims primarily at the prevention of substance use (i.e. tobacco smoking and drinking  
51 alcohol) by increasing general life skills as well as substance specific skills (i.e. coping with  
52  
53  
54  
55  
56  
57  
58  
59  
60

Field Code Changed

emotions, stress, problems, pressures to smoke and drink alcohol, increase of refusal skills and decrease of susceptibility to pro-smoking and pro-alcohol social influences).

The program delivers the contents in 14 units (most of them lasting 90 minutes) and in two workshops (four to six class hours) that are evenly distributed over the grades five and six. In detail, each lesson covers a specific topic, for instance problem solving, critical thinking, effective communication skills, decision-making, interpersonal relationship skills, self-awareness building skills, empathy, coping with stress, and emotions as well as the student's ability to work in a group. The two workshops include several activities about smoking cigarettes and alcohol misuse, and are designed as a student's course with nine challenging stations that either address different aspects of smoking cigarettes or aspects of alcohol misuse. Stations concerning the first workshop, smoking cigarettes, cover risks and disadvantages of smoking, smoking related knowledge, perceived norms, and self-efficacy to refuse a cigarette offers as well as strategies of advertisement and industry. The stations of the second workshop deal with the same issues, but tailored to the topic of alcohol misuse.~~The program delivers the contents (life skills, students' ability to work in a group, substance specific skills) in 14 units (most of them lasting 90 minutes) and in two workshops (four to six class hours) that are evenly distributed over the grades five and six. Workshops include several activities about substance use such as smoking cigarettes and alcohol misuse.~~ All components are realized by trained teachers within daily school-routine. Further details on the program have been described elsewhere.<sup>2019</sup>

Field Code Changed

### Design

A five-wave cluster randomized-controlled trial with two arms (intervention and control condition) is being conducted in four German federal states (Bremen, Hesse, North Rhine-Westphalia and Schleswig-Holstein) to evaluate the effects of "Eigenständig werden 5+6". The randomization occurred at school level to avoid information exchange between conditions in the school. For randomization, schools were stratified according to the following criteria: (1) study region, (2) type of school, (3) number of fifth grade classes per school. According to these strata, schools were randomly assigned to the two arms of the study with a 50 per cent chance of being allocated to either group by using coin toss method. Intervention group took part in "Eigenständig werden 5+6" and is compared to control group receiving education as usual, i.e. lessons and subjects following the standard school curriculum without specific interventions to foster life skills or to prevent smoking. ~~Baseline~~ aAssessments took place prior to the intervention in October/November 2010, post-tests were realized in June/July 2011 and June/July 2012, a 6-month follow-up was being



1  
2  
3  
4  
5  
6  
7 conducted in December 2012 and a 15-month follow-up will take place in September/October  
8 2013. For further details, see Hansen et al.<sup>2049</sup>

Field Code Changed

### 10 Study Sample

11 A priori sample size determination assuming a significance level of  $\alpha=0.05$ , power=0.80, a  
12 15% prevention effect, an average cluster size of 20 students per class, an intra class  
13 correlation of 0.02 and a drop-out rate of 25% revealed a recommended sample size of 158  
14 classes and 3,160 students at baseline (for detailed description of sample size determination  
15 see<sup>20</sup>). To recruit the sample, c~~Complete lists of all secondary schools of selected regions~~  
16 were obtained from the Ministries of Education of each federal state. An overall of 450  
17 secondary schools in the study regions were invited to participate in the study, of which 323  
18 (71.5%) did neither express approval or disapproval (Figure 1). The decision to participate in  
19 the study was expressed by 48 schools (11%) with 191 classes and 4,772 students. Of these  
20 48 schools agreeing to participate, 26 schools with 97 classes and 2,437 students were  
21 allocated to the intervention group whereas 22 schools with 94 classes and 2,335 students  
22 were assigned to the control condition. After randomization, three schools of the intervention  
23 group withdrew their consent as well as four teachers of intervention classes refused to take  
24 part.

Formatted: Do not check spelling or grammar, Superscript

25  
26  
27  
28  
29  
30  
31  
32 Consequently, baseline data comprises ~~s~~ 45 schools, 172 classes and 3,444 students with a  
33 mean age of 10.37 years (SD=0.59), 47.9% girls~~-;~~ with 1,685 students in 81 classes in the  
34 intervention and 1,759 students in 91 classes in the control condition. In respect to different  
35 outcome and covariate characteristics, intervention and control students were extensively  
36 comparable with the exception of a higher proportion of students of Gymnasiums in the  
37 control condition (for ~~sample size determination and~~ detailed baseline sample description  
38 see<sup>2049</sup>). Data presented herein refer to the baseline (October 2010) and 6-month follow-up  
39 survey (December 2012). It was possible to merge follow-up data of 1,255 students in the  
40 intervention arm and 1,438 students in the control arm (total N=2,693, 78.2% of N=3,444) to  
41 baseline data. For analysis, data sets with inconsistencies concerning age, gender, and  
42 smoking status were excluded (N=180). The final analysis sample consists of 2,513 data sets  
43 (intervention group: N=1,179, control group: N=1,334). Mean age at follow-up was 12.50  
44 years (SD=0.58).

Field Code Changed

50 - Insert Figure 1 about here -

### 53 Measures

1  
2  
3  
4  
5  
6  
7 Data ~~was~~were collected through self-completed anonymous questionnaires by teachers and  
8 students. ~~The d~~Development of ~~the~~ questionnaire and a complete list of variables and  
9 constructs assessed in the trial have been documented. <sup>2019</sup> ~~Analysis-Analyses~~ presented  
10 herein, rely on the following outcome measures: *Lifetime tobacco smoking* experience was  
11 assessed by asking how many cigarettes have ever been smoked in life. Nine answering  
12 categories ('none', 'only a few puffs', '1 cigarette', '2 cigarettes', '3-4 cigarettes', '5-9  
13 cigarettes', '10-19 cigarettes', '20-100 cigarettes', '>100 cigarettes') were provided. Students  
14 having smoked at least a few puffs were considered as ever smokers. *Smoking incidence* at  
15 follow-up among baseline never smokers was determined by combining ~~the~~ answers to  
16 lifetime smoking at baseline and follow-up: those who had never smoked at baseline, and  
17 indicated any smoking by the follow-up survey, even just a few puffs, were considered as  
18 having initiated smoking during the observation period. *Current smoking* frequency was  
19 measured by asking how many cigarettes are currently smoked. Respondents could answer  
20 'I don't smoke,' 'less than once a month', 'at least once a month, but not weekly', 'at least  
21 once a week, but not daily,' or 'daily'. Responses were dichotomized into students not  
22 smoking and students indicating any kind of current smoking.  
23  
24  
25  
26  
27  
28

29 To assess *attitudes towards smoking and risk perception*, respondents should rate eleven  
30 statements (e.g. 'Non-smokers are fitter', 'Non-smokers are cooler', 'If I smoke during the  
31 next month, I will get in trouble with my friends'). Answer categories comprise 0='not true',  
32 1='somewhat true', 2='rather true', and 3= 'totally true', i.e. higher values represent a more  
33 negative attitude towards smoking and more sensitive perception of risk. Cronbach's Alpha  
34 of this scale was 0.80. ~~A c~~Change in attitude from baseline to follow-up was determined by  
35 subtracting ~~the~~ baseline value from ~~the~~ follow-up value for each respondent. *Smoking related*  
36 *knowledge* was tested through seven statements (e.g. 'Cigarettes contain arsenic which is  
37 also found in rat poison.') to which respondents could either agree by answering 'true' or  
38 disagree by stating 'wrong' or state 'I don't know'. As indicator of knowledge, ~~the~~ percentage  
39 of correct classifications of statements was determined. ~~An i~~increase in knowledge from  
40 baseline to follow-up was determined by subtracting ~~the~~ baseline value from ~~the~~ follow-up  
41 value for each respondent. *Normative expectations* were measured on an 11-point scale  
42 ranging from 0='nobody' to 10='everybody' on which students had to estimate how many a)  
43 'Adults in Germany' and b) 'Adolescents at their age' in Germany smoke. *Self-efficacy* to  
44 refuse cigarette offers were assessed by asking 'To what extent do you dare to refuse  
45 cigarettes, even if your friends laugh at you or suspend you on that account?' with answer  
46 categories ranging from 0='not at all' to 3='totally'. Normative expectations and self-efficacy  
47 were analyzed on single item level.  
48  
49  
50  
51  
52  
53  
54  
55  
56  
57  
58  
59  
60

1  
2  
3  
4  
5  
6  
7  
8  
9  
10  
11  
12  
13  
14  
15  
16  
17  
18  
19  
20  
21  
22  
23  
24  
25  
26  
27  
28  
29  
30  
31  
32  
33  
34  
35  
36  
37  
38  
39  
40  
41  
42  
43  
44  
45  
46  
47  
48  
49  
50  
51  
52  
53  
54  
55  
56  
57  
58  
59  
60

*Covariate measures* were derived from studies that focused on risk factors of adolescent tobacco use, to control for confounding variables that would be theoretically related to the smoking measures.<sup>21-23,20-22</sup> Sociodemographics include age, gender, type of school (Gymnasium vs. other type of school), migration background (mother and/or father were born outside Germany) and socio-economic status (SES, Family Affluence Scale<sup>24,23</sup>). As personal characteristics, rebelliousness and sensation-seeking were assessed with two items in each case.<sup>25,26,24,25</sup> Parent, sibling and peer smoking were assessed as factors from social environment (no vs. any parent/sibling/peer smoking). Finally, students were asked whether they had participated in a comprehensive prevention program in elementary school with examples of most broadly disseminated programs given.

Field Code Changed

Field Code Changed

Field Code Changed

### Procedure

In schools having agreed to participate, teachers of the respective 5<sup>th</sup>-~~five~~ grade collected the parental informed consent. Students with refusal were excluded from all assessments. Data assessment was conducted in the class room and lasted 45 minutes. Research staff was responsible for the distribution, help in completion and collection of the questionnaire. To permit a linking of individual baseline and follow-up data while assuring anonymity, students generated a seven digit individual code. This procedure has been tested and used in several studies and therefore been inspected and approved by Ethics Committee, data protection and Ministries of Education repeatedly.<sup>27,26</sup> Teachers were not involved in ~~the~~ data assessment. At the end of the assessment, all questionnaires were placed in an envelope which was sealed in front of the class. Therefore, every student was assured that neither teachers nor parents were able to see the completed questionnaire.

Field Code Changed

Ethical approval for the trial was gained from the Ethics Committee of Medical Faculty of the University of Kiel. Additional approvals (e.g., from ministries of education, and parents) were sought as required.

### Analyses

Predictors of attrition were examined by multilevel mixed effect logistic regressions,  ~~$\chi^2$  and t-tests~~. To test for selective attrition, interaction effects for group condition and dependent variable were tested. Descriptive statistics (percentages, means, standard deviations) are crude values. To analyze ~~the~~ effects of the intervention on smoking behavior as well as on attitudes and knowledge, multilevel mixed effect regression models using Stata *mixed* and *meqrlogit* command were conducted, adjusting for covariates. In case of dichotomous outcomes, effect sizes (Cohen's d) were determined by using the converting formula

proposed by Borenstein et al.<sup>2827</sup> Effect sizes for metric outcomes were calculated as proposed by Feingold.<sup>2928</sup> All data analyses were conducted with Stata V.13.<sup>3029</sup>

Field Code Changed

Field Code Changed

Field Code Changed

## RESULTS

### Attrition analysis

Among the 3,444 students assessed at baseline, there ~~was-were~~ no data available in the analysis sample for 931 students (27.0%). ~~Drop-out was higher in intervention group (N=506, 30.0%) compared to control group (N=425, 24.2%;  $\chi^2(1)=15.02$ ,  $p<0.001$ ).~~ Overall, significantly higher attrition was ~~also~~ found for male students (31.2%;  $p<0.001$ ), ~~students attending other schools than Gymnasium (32.1%;  $p<0.001$ ),~~ students with a migration background (36.5%;  $p<0.001$ ), students indicating current smoking (45.7%;  $p=0.004047$ ) or current use of alcohol (39.8%;  $p<0.001$ ) at baseline. Furthermore, students dropping out of the study were older ~~than students in the retention sample~~ ( $M_{\text{attrition}}=10.5$  vs.  $M_{\text{retention}}=10.3$  years of age at baseline;  $p<=0.001003$ ) ~~and had a lower SES ( $M_{\text{attrition}}=-17.1$  vs.  $M_{\text{retention}}=-17.9$ ;  $p<0.001$ ) than students in the retention sample.~~ Besides these overall effects, no hints for selective attrition were found, i.e. the associations between variables listed above and attrition did not differ systematically between ~~the~~ intervention and control group.

### Effects on smoking behavior

Students in ~~the~~ intervention and control group did not differ in rates for lifetime and current smoking at baseline. At follow-up, 16.0% of intervention students indicated that they had ever smoked in their lives compared to 20.2% in the control students (Figure 2). This difference was statistically significant also after controlling for confounding factors (adjusted Odds Ratio [OR]=0.63; 95% confidence interval [CI]=[0.41; 0.96];  $p=0.026$ ).

While about 1% of intervention and control students reported current smoking at baseline, these rates increased to more than 5% at follow-up both in intervention and control group.

Therefore, no group differences could be found in ~~the~~ frequency of current smoking.

At baseline, 95.6% of the sample were never-smokers (N=2,403; ~~I~~~~G~~intervention group: 96.4%, ~~G~~control group: 94.9%). Among these baseline never-smokers, 15.5% initiated smoking during the observation period. ~~The~~ incidence rate was significantly lower in intervention students, among whom 13.7% reported ~~the~~ first use of cigarettes between baseline and follow-up, compared to ~~the~~ control group with an incidence rate of 17.1% (adjusted OR=0.66, 95% CI=[0.43; 1.00],  $p=0.047$ ).

- insert Figure 2 about here -

### Effects on smoking related knowledge and attitudes

Students of both groups showed about the same level of smoking related knowledge at baseline with correct answering rates of about 30% (Table 1). At follow-up, students in both groups scored better in the knowledge test: intervention students had a mean percentage of correct answers of 46.75, while ~~the intervention-control~~ students rated on average 37.74% of the statements correctly. The increase in knowledge was significantly higher in ~~the~~ intervention ~~students-group~~ (adjusted  $\beta=9.38$ ; 95% CI=[6.73; 12.04];  $p<0.001$ ).

- insert Table 1 about here -

A comparable pattern was found for attitudes towards smoking: At baseline, both groups did not differ in their attitudes and showed a rather critical perception of smoking with a mean score of 2.04 on the scale ranging from 0 to 3 (Table 1). At follow-up, students rated smoking even more negatively with a mean score of 2.24 in ~~the~~ intervention and 2.16 in ~~the~~ control group. Compared to ~~the~~ control group, this change in attitudes was more pronounced in ~~the~~ intervention group (adjusted  $\beta=0.10$ ; 95% CI=[0.03; 0.16];  $p=0.002$ ).

Normative expectations were hardly influenced by the intervention: While intervention students estimated smoking prevalence in adults marginally lower at follow-up compared to their estimation at baseline, a small increase in this estimate could be observed in control students (Table 1). For peer smoking, both groups showed a small increase in perceived frequency of smoking. None of these changes turned out to be statistically significant after covariates and baseline estimates were controlled for.

Already at baseline, students in both groups considered themselves rather capable to refuse cigarette offers (Table 1). During ~~the~~ observation period, self-efficacy even grew with a slightly higher – but statistically insignificant – increase in intervention students compared to control students.

Table 1.  
Descriptive statistics and multilevel mixed effects linear regressions for smoking related knowledge, attitudes, perceived norms and self-efficacy to refuse cigarette offers

|                                                 | Baseline             |               | Follow-up      |               | Change        |              | Difference in change |             |        |
|-------------------------------------------------|----------------------|---------------|----------------|---------------|---------------|--------------|----------------------|-------------|--------|
|                                                 | Beginning of grade 5 |               | Mid of grade 7 |               | Intervention  | Control      | adj. $\beta^1$       | 95% CI      | p      |
|                                                 | Intervention         | Control       | Intervention   | Control       |               |              |                      |             |        |
|                                                 | M (SD)               | M (SD)        | M (SD)         | M (SD)        | M (SD)        | M (SD)       |                      |             |        |
| Knowledge <sup>2</sup>                          | 30.34 (19.47)        | 30.11 (19.14) | 46.75 (21.59)  | 37.74 (20.45) | 16.53 (26.46) | 7.53 (24.13) | 9.38                 | 6.73; 12.04 | <0.001 |
| Attitudes/risk perception <sup>3</sup>          | 2.04 (0.51)          | 2.04 (0.51)   | 2.24 (0.51)    | 2.16 (0.54)   | 0.20 (0.61)   | 0.12 (0.61)  | 0.10                 | 0.03; 0.16  | 0.002  |
| Norms adult smoking <sup>4</sup>                | 6.08 (1.62)          | 5.97 (1.59)   | 6.04 (1.62)    | 6.09 (1.55)   | -0.03 (2.09)  | 0.12 (1.95)  | -0.08                | -0.24; 0.07 | 0.265  |
| Norms peer smoking <sup>4</sup>                 | 3.08 (2.64)          | 2.93 (2.56)   | 4.24 (2.28)    | 4.02 (2.18)   | 1.16 (3.10)   | 1.10 (2.93)  | 0.15                 | -0.13; 0.43 | 0.283  |
| Self-efficacy to refuse cigarettes <sup>5</sup> | 2.38 (1.04)          | 2.36 (1.03)   | 2.53 (0.80)    | 2.49 (0.85)   | 0.15 (1.20)   | 0.11 (1.22)  | 0.07                 | -0.03; 0.17 | 0.140  |

M = Mean, SD = Standard deviation, CI = Confidence interval

<sup>1</sup> Adjusted for age, gender, type of school, socio-economic status, immigration background, peer / parent / sibling smoking, sensation seeking, rebelliousness, earlier participation in a prevention program, baseline value of the respective variable

<sup>2</sup> Mean percentage of correct answers in a 7-item quiz

<sup>3</sup> Range 0 to 3, higher values representing more negative attitude

<sup>4</sup> Range 0 = nobody smokes to 10 = everybody smokes

<sup>5</sup> Range 0-3, higher values representing higher self-efficacy

Effect sizes for significant program effects were small to medium with  $d=0.26$  (lifetime smoking),  $d=0.23$  (incidence of smoking),  $d=0.45$  (smoking related knowledge), and  $d=0.15$  (attitudes/risk perception).

### **Sensitivity analyses**

Since a substantial proportion of cases was excluded from the analysis sample due to inconsistent data ( $N=180$ ) or as they were lost to follow-up ( $N=931$ ), we conducted some sensitivity analyses to estimate the risk that the findings might be biased by these exclusions. First, we reran the analyses with inconsistent cases left in the dataset. This re-inclusion of inconsistent cases hardly changed the results for metric outcomes with significant effects for knowledge and attitudes and slightly changed results for smoking behavior with marginally significant associations for lifetime smoking ( $p=0.086$ ) and incidence ( $p=0.083$ ). To address the restriction of sample to complete cases, predictors for higher attrition were used as guide to create subsamples. As the attrition rate was highest in baseline current smokers and therefore this (small) subgroup of students smoking already very early might differ substantially from the majority of non-smoking students, we excluded baseline current smokers ( $N=25$ ) completely. For this subsample, we found the same significant effects for lifetime smoking ( $p=0.030$ ), knowledge ( $p<0.001$ ) and attitudes ( $p=0.002$ ) and no effects on current smoking, norms and self-efficacy. Further factors being associated with a higher risk of attrition (male gender, higher age, migration background) were explored by analyzing subsamples of male students, students aged  $\geq 11$  years at baseline and students with migration background. In these subsamples, incidence rates in control students exceeded those of intervention by 4 to 7 percent points (reaching significance for older students,  $p=0.026$ , marginal significance for students with migration background,  $p=0.061$ , and failing to reach significance for male students,  $p=0.225$ ).

### **DISCUSSION**

The current study aimed to investigate the effects of a school-based prevention program on smoking related knowledge, attitudes and behavior six months after the end of program implementation. Using a cluster randomized controlled design, findings revealed that the program participation seems to reduce the prevalence and incidence of lifetime smoking, to increase smoking related knowledge, and to influence attitudes and perceived risks of smoking towards a more critical perception. Program effects on the prevalence of current smoking, normative expectations or refusal skills could not be determined. Using Cohen's classification of effect sizes,<sup>3130</sup> effect size was small for smoking behavior and attitudes, while there was a medium effect on smoking related knowledge.

Formatted: Font: Bold

Formatted: Font: Arial, Not Highlight

Field Code Changed



The pattern found for effects on smoking behavior with significant small effects on smoking incidence ( $d=0.23$ ) and lifetime smoking ( $d=0.26$ ), and no effect on current smoking can be aligned quite well with [the](#) results presented in former meta-analyses: The pooled odds ratio of 0.88 for smoking onset at [the](#) longest follow-up revealed by the overall analysis of Thomas et al.<sup>13,42</sup> corresponds to an effect size of  $d=0.07$ , while their subgroup analyses for different intervention approaches provided even moderate effect sizes (odds ratios between 0.49 and 0.52 corresponding to  $d$ 's between 0.36 and 0.39). Earlier meta-analyses on school-based drug prevention programs,<sup>14,43</sup> psychosocial smoking prevention programs,<sup>15,44</sup> or studies on Project DARE (Drug Abuse Resistance Education),<sup>16,45</sup> the most widely used school-based drug prevention program in the United States and focusing on teaching skills to recognize and resist social pressure, also determined small program effects on substance use with  $d$ 's ranging between 0.08 and 0.18. Finding no effect on current smoking might also be explained to some extent by the young age of the sample with only very few students smoking already on a regular basis.

[The p](#)Participation in "Eigenständig werden 5+6" significantly increased smoking related knowledge with an effect size of  $d=0.45$  – the highest effect found in our analyses. This medium effect is in line with effect sizes ranging from 0.36 to 0.42 determined in meta-analyses referred to above.<sup>14-16,43-45</sup> Attitudes were influenced also significantly by the intervention, the small effect ( $d=0.15$ ) compares well with [the](#) small effects in a range from 0.11 to 0.26 having been reported.<sup>14-16,43-45</sup>

We were not able to show an effect of the intervention in correcting perceived norms of smoking or [in enhancing](#) self-efficacy to refuse offered cigarettes. Students of both intervention and control group consider themselves to be rather highly self-efficacious to resist to cigarette offers already at the outset of the study and this rating even increases in both groups at follow-up, i.e. a ceiling effect might decrease [the](#) discriminative power of the group comparisons. As far as perceived norms of smoking are concerned, a possible explanation of the null-effect is the fact that only a minor part of the intervention (one subtask among nine tasks of the smoking workshop at the end of grade 5) deals with the topic of norms. Most tasks in the workshop address facts about and visualization of [the](#) short- and long-term consequences of smoking, others aim to scrutinize strategies of [the](#) tobacco industry or to foster resistance skills.

Some limitations of the current study have to be considered: [During the 26 month period from baseline to follow-up, t](#)There has been some drop-out from the study, [from baseline to follow-up, t](#)he analysis sample ( $N=2,513$ ) amounted to 73.0% of the baseline sample

Field Code Changed

Formatted: Font: Arial, Not Italic

Formatted: Font: Arial, Not Italic



1  
2  
3  
4  
5  
6  
7  
8  
9  
10  
11  
12  
13  
14  
15  
16  
17  
18  
19  
20  
21  
22  
23  
24  
25  
26  
27  
28  
29  
30  
31  
32  
33  
34  
35  
36  
37  
38  
39  
40  
41  
42  
43  
44  
45  
46  
47  
48  
49  
50  
51  
52  
53  
54  
55  
56  
57  
58  
59  
60

(N=3,444). This drop-out was slightly higher than expected in the a priori power calculation (25%), but since the baseline sample was somewhat larger than calculated (N=3,444 instead of N=3,160), the analysis sample still exceeds the estimated sample at follow-up (75% of 3,160 = 2,370). Therefore, the power of the analyses should be adequate.

~~Nevertheless~~Furthermore, we did not find any hints for selective attrition which could restrict the validity of findings and sensitivity analyses revealed very comparable patterns of results in subsamples with higher risk for attrition and smoking. The curriculum "Eigenständig werden 5+6" comprises of 14 lessons à on average 90 minutes and two workshops with 4 to 6 hours of duration which are implemented by teachers in addition to usual education, i.e. the program is quite time-consuming, it requires some dedication by teachers and it seems unreasonable to assume that the intervention is delivered to all classes exactly in the way and to the extent foreseen by the manual. ~~The a~~Analyses in this report were not controlled for treatment integrity, <sup>32:3334:32</sup> i.e. classes with low treatment fidelity ~~that and having have~~ only been exposed ~~only~~ to parts of the intervention contribute to the same extent to the results of the intervention group as classes with complete program implementation.

~~Therefore, and~~ results can be considered as rather conservative. Another limitation is the reliance on self-reports in the assessment of outcomes. Especially for outcomes assessing smoking behavior, but also for attitudes towards smoking, answers might be biased by social desirability. These influences might occur more likely in the intervention group since students might be primed by the intervention that smoking is an "unwanted" behavior. Nevertheless, since purchase of cigarettes and smoking in public is forbidden by law for minors in Germany, ~~also the~~ students in the control condition are not free of a social desirability bias as well. For other outcomes like the assessment of refusal skills, validity of self-report data might be limited by restricted accessibility, i.e. whether adolescents are really able to judge their own competence to resist cigarette offers. Finally, the study was run in regular public schools of four federal states of Germany, i.e. the generalizability might be limited due to these regional constraints and restricted to adolescents visiting regular schools.

On the other hand, some strengths of the current study ~~iesy~~ should be born in mind: Results were derived from a cluster randomized controlled trial, applying sophisticated statistical methods, comprising a range of several outcomes and following students up for six months after the end of intervention. Therefore, we implemented rather rigorous evaluation methods, which are in line with recommendations like those of the Society for Prevention Research, <sup>34:33</sup>

Perspectives and open questions for future research might be the following: In the current trial, a further follow-up at 15 months after end of intervention is being conducted to explore stability of effects in the longer term. Furthermore, exploring effects on other outcomes than

Field Code Changed

Field Code Changed

1  
2  
3  
4  
5  
6  
7  
8  
9  
10  
11  
12  
13  
14  
15  
16  
17  
18  
19  
20  
21  
22  
23  
24  
25  
26  
27  
28  
29  
30  
31  
32  
33  
34  
35  
36  
37  
38  
39  
40  
41  
42  
43  
44  
45  
46  
47  
48  
49  
50  
51  
52  
53  
54  
55  
56  
57  
58  
59  
60

smoking, e.g. alcohol use or life skills, is owing for the current study. On the basis of findings for efficacy, effectiveness in relation to costs as well as generalizability to other populations should be investigated. Finally, besides stating whether an intervention is effective or not, mechanisms by which shown effects can be explained theoretically and empirically are to be explored. These mediation analyses may contribute to investigate causal models for preventive intervention, e.g. to explore whether knowledge or change in attitude are necessary preconditions for behavior change.<sup>1443</sup>

For peer review only

Field Code Changed  
Formatted: English (U.S.)  
Formatted: English (U.S.)

## Figure legends

Figure 1. Participation flowchart

Figure 2. Percentage of lifetime smoking, current smoking at baseline and 6-month follow-up, percentage of smoking incidence at 6-month follow-up among baseline never-smokers, and multilevel mixed effects logistic regressions; OR = odds ratio, CI = confidence interval; logistic regressions were adjusted for age, gender, type of school, socio-economic status, immigration background, peer / parent / sibling smoking, sensation seeking, rebelliousness, earlier participation in [a](#) prevention program

## Acknowledgements

Marianne Bayrhuber contributed to the completion of the project by organizing the data assessments. Maja Hornberger, Gudrun Wiborg, Birte Walther, Hinnerk Frahm and Heike Kühl-Frese were involved in the development of the prevention program. Malin Bachmann, Tina Basner, Jana Blumkowski, Dorothea Breckwoldt, Roxana Buzila, Svenja Cleve, Malte Dincher, Eva-Maria Eggert, Nadia El Bouhayati, Almut Engelhardt, Sigrid Feierabend, Sarah Göhlert, Lars Grabbe, Judith Hanewinkel, Oksana Herdt, Semiha Idrizovic, Sabiha Izaamriouane, Martin Karsten, Andre Lischick, Stefanie Otte, Serdar Peker, Ines Pohlmann, Wiebke Pustal, Gesa Sander, Christoph Schlüter, Björn Seiler, Beate Steiber, Alexander Wierzock and Nicole Wilmes assessed the data.

We would like to thank our partners: Institut für Qualitätsentwicklung an Schulen Schleswig-Holstein, Landesinstitut für Schule Bremen, Krisenhilfe Bochum, Fachstelle für Suchtprävention im Wetteraukreis, Fachstelle für Suchtprävention des Zweckverbandes der Diakonie Bad Hersfeld, Diakonie Herford, Koordinationsstelle Schulische Suchtvorbeugung, Fachstelle für Suchtvorbeugung Dortmund, Hessische Landesstelle für Suchtfragen, Ginko Stiftung für Prävention, and all schools that participated in the study.

## Funding

This work was supported by German Cancer Aid (Grant Number: 108374).

## Competing interests

None.

## Ethics approval

Ethics approval was provided by the Ethics Committee of the Medical Faculty of the University of Kiel (Ref.: D 419/10).

**Contributors**

BI performed the statistical analysis and interpretation of the data and drafted the manuscript. JH contributed to the acquisition of the data and participated in drafting the manuscript. KM contributed to the acquisition and management of the data. RH as principle investigator is responsible for the study concept, design and supervision and helped in drafting the manuscript.

All authors had full access to all of the data in the study and take responsibility for the integrity of the data and the accuracy of the data analysis. All authors conducted a critical revision of the article and granted final approval of the article for important intellectual content.

**Data sharing statement**

No additional data available.

## References

- (1) Lim SS, Vos T, Flaxman AD, Danaei G, et al. A comparative risk assessment of burden of disease and injury attributable to 67 risk factors and risk factor clusters in 21 regions, 1990-2010: a systematic analysis for the Global Burden of Disease Study 2010. *Lancet* 2013; 380(9859):2224-2260.
- (2) Bundeszentrale für gesundheitliche Aufklärung. Der Tabakkonsum Jugendlicher und junger Erwachsener in Deutschland 2012. Ergebnisse einer aktuellen Repräsentativbefragung und Trends. Köln: Bundeszentrale für gesundheitliche Aufklärung; 2013.
- (3) Robert Koch-Institut. Die Gesundheit von Kindern und Jugendlichen in Deutschland. Berlin: Robert Koch-Institut; 2013.
- (4) World Health Organisation. Life skills education in schools, parts 1 and 2. Geneva: WHO, Division of Mental Health; 1994.
- (5) Evans RI. Smoking in children: developing a social psychological strategy of deterrence. *Prev Med* 1976; 51:122-127.
- (6) Donaldson SI, Graham JW, Hansen WB. Testing the generalizability of intervening mechanism theories: understanding the effects of adolescent drug use prevention interventions. *J Behav Med* 1994; 17(2):195-216.
- (7) Flay BR. The promise of long-term effectiveness of school-based smoking prevention programs: a critical review of reviews. *Tob Induc Dis* 2009; 5(1):7.
- (8) Cuijpers P. Effective ingredients of school-based drug prevention programs. A systematic review. *Addict Behav* 2002; 27(6):1009-1023.
- (9) Gottfredson DC, Wilson DB. Characteristics of effective school-based substance abuse prevention. *Prev Sci* 2003; 4(1):27-38.
- (10) Flay BR. School-based smoking prevention programs with the promise of long-term effects. *Tob Induc Dis* 2009; 5(1):6.
- (11) Skara S, Sussman S. A review of 25 long-term adolescent tobacco and other drug use prevention program evaluations. *Prev Med* 2003; 37(5):451-474.
- (12) Wiehe SE, Garrison MM, Christakis DA, Ebel BE, Rivara FP. A systematic review of school-based smoking prevention trials with long-term follow-up. *J Adolesc Health* 2005; 36(3):162-169.
- (13) Thomas RE, McLellan J, Perera R. School-based programmes for preventing smoking. *Cochrane Database Syst Rev* 2013; 4:CD001293.
- (14) Tobler NS, Stratton HH. Effectiveness of school-based drug prevention programs: a meta-analysis of the research. *J Prim Prev* 1997; 18(1):71-128.

Formatted: Space After: 12 pt

Formatted: Font: Italic, German (Germany), Do not check spelling or grammar

Formatted: German (Germany)

Formatted: Font: Italic, Do not check spelling or grammar

Formatted: Font: Italic, Do not check spelling or grammar

Formatted: Font: Italic, Do not check spelling or grammar

Formatted: Font: Italic, Do not check spelling or grammar

Formatted: Font: Italic, Do not check spelling or grammar

Formatted: Font: Italic, Do not check spelling or grammar

Formatted: Font: Italic, Do not check spelling or grammar

Formatted: Font: Italic, Do not check spelling or grammar

Formatted: Font: Italic, Do not check spelling or grammar

Formatted: Font: Italic, Do not check spelling or grammar

1  
2  
3  
4  
5  
6  
7  
8  
9  
10  
11  
12  
13  
14  
15  
16  
17  
18  
19  
20  
21  
22  
23  
24  
25  
26  
27  
28  
29  
30  
31  
32  
33  
34  
35  
36  
37  
38  
39  
40  
41  
42  
43  
44  
45  
46  
47  
48  
49  
50  
51  
52  
53  
54  
55  
56  
57  
58  
59  
60

(15) Hwang MS, Yeagley KL, Petosa R. A meta-analysis of adolescent psychosocial smoking prevention programs published between 1978 and 1997 in the United States. *Health Educ Behav* 2004; 31(6):702-719.

**Formatted:** Font: Italic, Do not check spelling or grammar

(16) Ennett ST, Tobler NS, Ringwalt CL, Flewelling RL. How effective is drug abuse resistance education? A meta-analysis of Project DARE outcome evaluations. *Am J Public Health* 1994; 84(9):1394-1401.

**Formatted:** Font: Italic, Do not check spelling or grammar

(17) Müller-Riemenschneider F, Rasch A, Bockelbrink A, Vauth C, Willich SN, Greiner W. Effectiveness and cost-effectiveness of behavioural strategies in the prevention of cigarette smoking. *GMS Health Technol Assess* 2008; 4:Doc10.

**Formatted:** Font: Italic, Do not check spelling or grammar

(18) Cuijpers P. Three decades of drug prevention research. *Drug Educ Prev Polic* 2003; 10(1):7-20.

**Formatted:** Font: Italic, Do not check spelling or grammar

(19) Hansen WB, Dusenbury L, Bishop D, Derzon JH. Substance abuse prevention program content: systematizing the classification of what programs target for change. *Health Educ Res* 2007; 22(3):351-360.

**Formatted:** Font: Italic, Do not check spelling or grammar

(20) Hansen J, Hanewinkel R, Maruska K, Isensee B. The 'Eigenständig werden' prevention trial: a cluster randomised controlled study on a school-based life skills programme to prevent substance use onset. *BMJ Open* 2011; 1(2):e000352.

**Formatted:** Font: Italic, Do not check spelling or grammar

(21) Gibbons FX, Gerrard M. Predicting young adults' health risk behavior. *J Pers Soc Psychol* 1995; 69(3):505-517.

**Formatted:** Font: Italic, Do not check spelling or grammar

(22) Hawkins JD, Catalano RF, Miller JY. Risk and protective factors for alcohol and other drug problems in adolescence and early adulthood: implications for substance abuse prevention. *Psychol Bull* 1992; 112(1):64-105.

**Formatted:** Font: Italic, Do not check spelling or grammar

(23) Petraitis J, Flay BR, Miller TQ. Reviewing theories of adolescent substance use: organizing pieces in the puzzle. *Psychol Bull* 1995; 117(1):67-86.

**Formatted:** Font: Italic, Do not check spelling or grammar

(24) Currie C, Molcho M, Boyce W, Holstein B, Torsheim T, Richter M. Researching health inequalities in adolescents: the development of the Health Behaviour in School-Aged Children (HBSC) family affluence scale. *Soc Sci Med* 2008; 66(6):1429-1436.

**Formatted:** Font: Italic, Do not check spelling or grammar

(25) Stephenson MT, Hoyle RH, Palmgreen P, Slater MD. Brief measures of sensation seeking for screening and large-scale surveys. *Drug Alcohol Depend* 2003; 72(3):279-286.

**Formatted:** Font: Italic, Do not check spelling or grammar

(26) Burt RD, Dinh KT, Peterson Jr AV, Sarason IG. Predicting adolescent smoking: a prospective study of personality variables. *Prev Med* 2000; 30(2):115-125.

**Formatted:** Font: Italic, Do not check spelling or grammar

(27) Galanti MR, Siliquini R, Cuomo L, Melero JC, Panella M, Faggiano F. Testing anonymous link procedures for follow-up of adolescents in a school-based trial: The EU-DAP pilot study. *Prev Med* 2007; 44(2):174-177.

**Formatted:** Font: Italic, Do not check spelling or grammar

(28) Borenstein M, Hedges LV, Higgins JPT, Rothstein HR. Introduction to meta-analysis. Chichester: Jon Wiley & Sons; 2009.

(29) Feingold A. Effect sizes for growth-modeling analysis for controlled clinical trials in the same metric as for classical analysis. *Psychol Methods* 2009; 14(1):43-53.

**Formatted:** Font: Italic, Do not check spelling or grammar

(30) StataCorp. Stata Statistical Software: Release 13. College Stations, Texas: StataCorp; 2013.

- (31) Cohen J. Statistical power analyses for behavioral science. Hilldale, New York: Erlbaum; 1988.
- (32) Bishop DC, Pankratz MM, Hansen WB, Albritton J, Albritton L, Strack J. Measuring Fidelity and Adaptation: Reliability of a Instrument for School-Based Prevention Programs. *Eval Health Prof* 2013.
- (33) Dusenbury L, Brannigan R, Falco M, Hansen WB. A review of research on fidelity of implementation: implications for drug abuse prevention in school settings. *Health Educ Res* 2003; 18(2):237-256.
- (34) Flay BR, Biglan A, Boruch RF, Castro FG, Gottfredson D, Kellam S et al. Standards of evidence: criteria for efficacy, effectiveness and dissemination. *Prev Sci* 2005; 6(3):151-175.

## REFERENCES

- (1) ~~Lim SS, Vos T, Flaxman AD, Danaei G, et al. A comparative risk assessment of burden of disease and injury attributable to 67 risk factors and risk factor clusters in 21 regions, 1990-2010: a systematic analysis for the Global Burden of Disease Study 2010. *Lancet* 2013; 380(9859):2224-2260.~~
- (2) ~~Bundeszentrale für gesundheitliche Aufklärung. Der Tabakkonsum Jugendlicher und junger Erwachsener in Deutschland 2012. Ergebnisse einer aktuellen Repräsentativbefragung und Trends. Köln: Bundeszentrale für gesundheitliche Aufklärung; 2013.~~
- (3) ~~World Health Organisation. Life skills education in schools, parts 1 and 2. Geneva: WHO, Division of Mental Health; 1994.~~
- (4) ~~Evans RI. Smoking in children: developing a social psychological strategy of deterrence. *Prev Med* 1976; 5(1):122-127.~~
- (5) ~~Donaldson SI, Graham JW, Hansen WB. Testing the generalizability of intervening mechanism theories: understanding the effects of adolescent drug use prevention interventions. *J Behav Med* 1994; 17(2):195-216.~~
- (6) ~~Flay BR. The promise of long term effectiveness of school based smoking prevention programs: a critical review of reviews. *Tob Induc Dis* 2009; 5(1):7.~~
- (7) ~~Cuijpers P. Effective ingredients of school based drug prevention programs. A systematic review. *Addict Behav* 2002; 27(6):1009-1023.~~
- (8) ~~Gottfredson DC, Wilson DB. Characteristics of effective school based substance abuse prevention. *Prev Sci* 2003; 4(1):27-38.~~
- (9) ~~Flay BR. School based smoking prevention programs with the promise of long term effects. *Tob Induc Dis* 2009; 5(1):6.~~
- (10) ~~Skara S, Sussman S. A review of 25 long term adolescent tobacco and other drug use prevention program evaluations. *Prev Med* 2003; 37(5):451-474.~~

**Formatted:** Font: Italic, Do not check spelling or grammar

**Formatted:** Font: Italic, Do not check spelling or grammar

**Formatted:** Font: Italic, Do not check spelling or grammar

**Formatted:** Indent: Left: 0", Hanging: 0.5", Space After: 0 pt, Line spacing: single, Tab stops: 0.38", Right + 0.5", Left

**Formatted:** German (Germany)

- 1  
2  
3  
4  
5  
6  
7  
8  
9  
10  
11  
12  
13  
14  
15  
16  
17  
18  
19  
20  
21  
22  
23  
24  
25  
26  
27  
28  
29  
30  
31  
32  
33  
34  
35  
36  
37  
38  
39  
40  
41  
42  
43  
44  
45  
46  
47  
48  
49  
50  
51  
52  
53  
54  
55  
56  
57  
58  
59  
60
- ~~(11) Wiehe SE, Garrison MM, Christakis DA, Ebel BE, Rivara FP. A systematic review of school-based smoking prevention trials with long-term follow-up. *J Adolesc Health* 2005; 36(3):162-169.~~
  - ~~(12) Thomas RE, McLellan J, Perera R. School-based programmes for preventing smoking. *Cochrane Database Syst Rev* 2013; 4:CD001293.~~
  - ~~(13) Tobler NS, Stratton HH. Effectiveness of school-based drug prevention programs: a meta-analysis of the research. *J Prim Prev* 1997; 18(1):71-128.~~
  - ~~(14) Hwang MS, Yeagley KL, Petosa R. A meta-analysis of adolescent psychosocial smoking prevention programs published between 1978 and 1997 in the United States. *Health Educ Behav* 2004; 31(6):702-719.~~
  - ~~(15) Ennett ST, Tobler NS, Ringwalt CL, Flewelling RL. How effective is drug abuse resistance education? A meta-analysis of Project DARE outcome evaluations. *Am J Public Health* 1994; 84(9):1394-1401.~~
  - ~~(16) Müller-Riemenschneider F, Rasch A, Bockelbrink A, Vauth C, Willich SN, Greiner W. Effectiveness and cost-effectiveness of behavioural strategies in the prevention of cigarette smoking. *GMS Health Technol Assess* 2008; 4:Doc10.~~
  - ~~(17) Cuijpers P. Three decades of drug prevention research. *Drug Educ Prev Polic* 2003; 10(1):7-20.~~
  - ~~(18) Hansen WB, Dusenbury L, Bishop D, Derzon JH. Substance abuse prevention program content: systematizing the classification of what programs target for change. *Health Educ Res* 2007; 22(3):351-360.~~
  - ~~(19) Hansen J, Hanewinkel R, Maruska K, Isensee B. The 'Eigenständig werden' prevention trial: a cluster randomised controlled study on a school-based life skills programme to prevent substance use onset. *BMJ Open* 2011; 1(2):e000352.~~
  - ~~(20) Gibbons FX, Gerrard M. Predicting young adults' health risk behavior. *J Pers Soc Psychol* 1995; 69(3):505-517.~~
  - ~~(21) Hawkins JD, Catalano RF, Miller JY. Risk and protective factors for alcohol and other drug problems in adolescence and early adulthood: implications for substance abuse prevention. *Psychol Bull* 1992; 112(1):64-105.~~
  - ~~(22) Petraitis J, Flay BR, Miller TQ. Reviewing theories of adolescent substance use: organizing pieces in the puzzle. *Psychol Bull* 1995; 117(1):67-86.~~
  - ~~(23) Currie C, Molcho M, Boyce W, Holstein B, Torsheim T, Richter M. Researching health inequalities in adolescents: the development of the Health Behaviour in School-Aged Children (HBSC) family affluence scale. *Soc Sci Med* 2008; 66(6):1429-1436.~~
  - ~~(24) Stephenson MT, Hoyle RH, Palmgreen P, Slater MD. Brief measures of sensation seeking for screening and large scale surveys. *Drug Alcohol Depend* 2003; 72(3):279-286.~~
  - ~~(25) Burt RD, Dinh KT, Peterson Jr AV, Sarason IG. Predicting adolescent smoking: a prospective study of personality variables. *Prev Med* 2000; 30(2):115-125.~~



1  
2  
3  
4  
5  
6  
7  
8  
9  
10  
11  
12  
13  
14  
15  
16  
17  
18  
19  
20  
21  
22  
23  
24  
25  
26  
27  
28  
29  
30  
31  
32  
33  
34  
35  
36  
37  
38  
39  
40  
41  
42  
43  
44  
45  
46  
47  
48  
49  
50  
51  
52  
53  
54  
55  
56  
57  
58  
59  
60

- ~~-(26) Galanti MR, Siliquini R, Cuomo L, Melero JC, Panella M, Faggiano F. Testing anonymous link procedures for follow up of adolescents in a school-based trial: The EU-DAP pilot study. *Prev Med* 2007; 44(2):174-177.~~
- ~~-(27) Borenstein M, Hedges LV, Higgins JPT, Rothstein HR. Introduction to meta-analysis. Chichester: Jon Wiley & Sons; 2009.~~
- ~~-(28) Feingold A. Effect sizes for growth modeling analysis for controlled clinical trials in the same metric as for classical analysis. *Psychol Methods* 2009; 14(1):43-53.~~
- ~~-(29) StataCorp. Stata Statistical Software: Release 13. College Stations, Texas: StataCorp; 2013.~~
- ~~-(30) Cohen J. Statistical power analyses for behavioral science. Hilldale, New York: Erlbaum; 1988.~~
- ~~-(31) Bishop DC, Pankratz MM, Hansen WB, Albritton J, Albritton L, Strack J. Measuring Fidelity and Adaptation: Reliability of a Instrument for School Based Prevention Programs. *Eval Health Prof* 2013.~~
- ~~-(32) Dusenbury L, Brannigan R, Falco M, Hansen WB. A review of research on fidelity of implementation: implications for drug abuse prevention in school settings. *Health Educ Res* 2003; 18(2):237-256.~~
- ~~-(33) Flay BR, Biglan A, Boruch RF, Castro FG, Gottfredson D, Kellam S et al. Standards of evidence: criteria for efficacy, effectiveness and dissemination. *Prev Sci* 2005; 6(3):151-175.~~

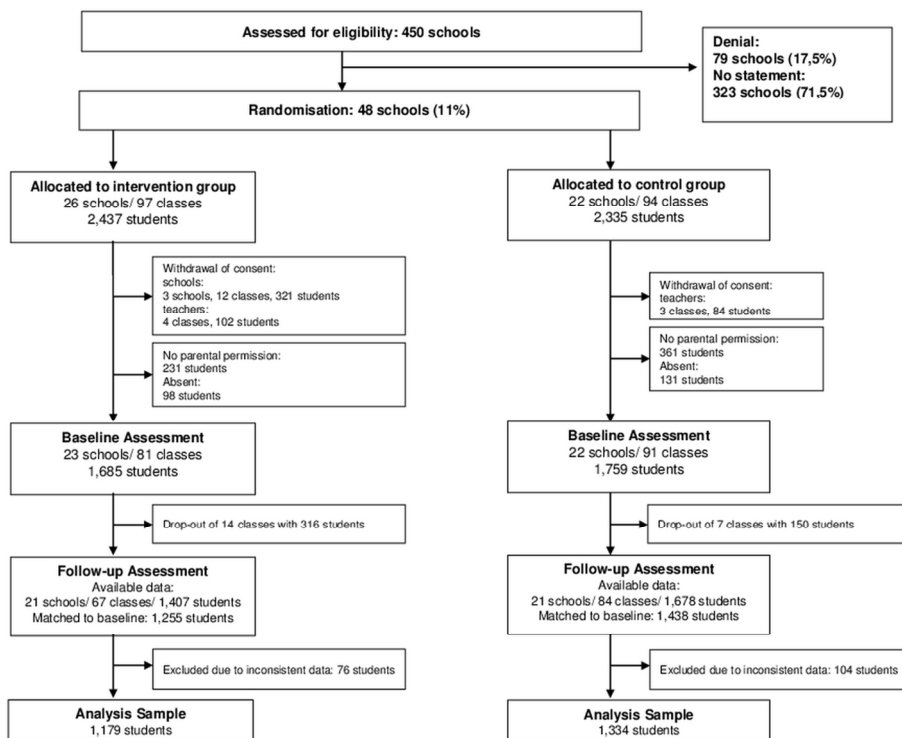

119x90mm (300 x 300 DPI)

Review only

1  
2  
3  
4  
5  
6  
7  
8  
9  
10  
11  
12  
13  
14  
15  
16  
17  
18  
19  
20  
21  
22  
23  
24  
25  
26  
27  
28  
29  
30  
31  
32  
33  
34  
35  
36  
37  
38  
39  
40  
41  
42  
43  
44  
45  
46  
47  
48  
49  
50  
51  
52  
53  
54  
55  
56  
57  
58  
59  
60

1  
2  
3  
4  
5  
6  
7  
8  
9  
10  
11  
12  
13  
14  
15  
16  
17  
18  
19  
20  
21  
22  
23  
24  
25  
26  
27  
28  
29  
30  
31  
32  
33  
34  
35  
36  
37  
38  
39  
40  
41  
42  
43  
44  
45  
46  
47  
48  
49  
50  
51  
52  
53  
54  
55  
56  
57  
58  
59  
60

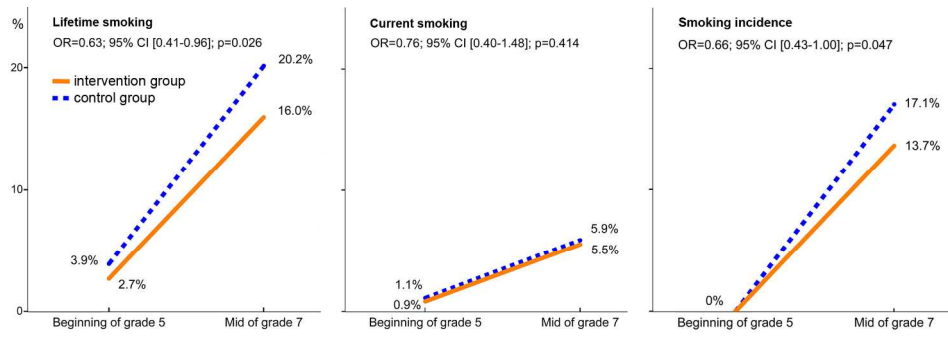

202x65mm (300 x 300 DPI)

peer review only

**Table 1: CONSORT 2010 checklist of information to include when reporting a cluster randomised trial**

| Section/Topic                    | Item No | Standard Checklist item                                                                                                               | Extension for cluster designs                                                                   | Page No * |
|----------------------------------|---------|---------------------------------------------------------------------------------------------------------------------------------------|-------------------------------------------------------------------------------------------------|-----------|
| <b>Title and abstract</b>        |         |                                                                                                                                       |                                                                                                 |           |
|                                  | 1a      | Identification as a randomised trial in the title                                                                                     | Identification as a cluster randomised trial in the title                                       | p. 1      |
|                                  | 1b      | Structured summary of trial design, methods, results, and conclusions (for specific guidance see CONSORT for abstracts)               | See table 2                                                                                     | p. 2      |
| <b>Introduction</b>              |         |                                                                                                                                       |                                                                                                 |           |
| <b>Background and objectives</b> | 2a      | Scientific background and explanation of rationale                                                                                    | Rationale for using a cluster design                                                            | p. 5      |
|                                  | 2b      | Specific objectives or hypotheses                                                                                                     | Whether objectives pertain to the cluster level, the individual participant level or both       | p. 5      |
| <b>Methods</b>                   |         |                                                                                                                                       |                                                                                                 |           |
| <b>Trial design</b>              | 3a      | Description of trial design (such as parallel, factorial) including allocation ratio                                                  | Definition of cluster and description of how the design features apply to the clusters          | p. 6      |
|                                  | 3b      | Important changes to methods after trial commencement (such as eligibility criteria), with reasons                                    |                                                                                                 | p. 6      |
| <b>Participants</b>              | 4a      | Eligibility criteria for participants                                                                                                 | Eligibility criteria for clusters                                                               | p. 6      |
|                                  | 4b      | Settings and locations where the data were collected                                                                                  |                                                                                                 | p. 6      |
| <b>Interventions</b>             | 5       | The interventions for each group with sufficient details to allow replication, including how and when they were actually administered | Whether interventions pertain to the cluster level, the individual participant level or both    | p. 5      |
| <b>Outcomes</b>                  | 6a      | Completely defined pre-specified primary and secondary outcome measures, including how and                                            | Whether outcome measures pertain to the cluster level, the individual participant level or both | p. 7      |

|                                         |     |                                                                                                                                                                                             |                                                                                                                                                                                                                         |      |
|-----------------------------------------|-----|---------------------------------------------------------------------------------------------------------------------------------------------------------------------------------------------|-------------------------------------------------------------------------------------------------------------------------------------------------------------------------------------------------------------------------|------|
|                                         |     | when they were assessed                                                                                                                                                                     |                                                                                                                                                                                                                         |      |
|                                         | 6b  | Any changes to trial outcomes after the trial commenced, with reasons                                                                                                                       |                                                                                                                                                                                                                         | n.a. |
| <b>Sample size</b>                      | 7a  | How sample size was determined                                                                                                                                                              | Method of calculation, number of clusters(s) (and whether equal or unequal cluster sizes are assumed), cluster size, a coefficient of intracluster correlation (ICC or <i>k</i> ), and an indication of its uncertainty | p. 6 |
|                                         | 7b  | When applicable, explanation of any interim analyses and stopping guidelines                                                                                                                |                                                                                                                                                                                                                         | n.a. |
| <b>Randomisation:</b>                   |     |                                                                                                                                                                                             |                                                                                                                                                                                                                         |      |
| <b>Sequence generation</b>              | 8a  | Method used to generate the random allocation sequence                                                                                                                                      |                                                                                                                                                                                                                         | p. 6 |
|                                         | 8b  | Type of randomisation; details of any restriction (such as blocking and block size)                                                                                                         | Details of stratification or matching if used                                                                                                                                                                           | p. 6 |
| <b>Allocation concealment mechanism</b> | 9   | Mechanism used to implement the random allocation sequence (such as sequentially numbered containers), describing any steps taken to conceal the sequence until interventions were assigned | Specification that allocation was based on clusters rather than individuals and whether allocation concealment (if any) was at the cluster level, the individual participant level or both                              | p. 6 |
| <b>Implementation</b>                   | 10  | Who generated the random allocation sequence, who enrolled participants, and who assigned participants to interventions                                                                     | Replace by 10a, 10b and 10c                                                                                                                                                                                             |      |
|                                         | 10a |                                                                                                                                                                                             | Who generated the random allocation sequence, who enrolled clusters, and who assigned clusters to interventions                                                                                                         | p. 6 |
|                                         | 10b |                                                                                                                                                                                             | Mechanism by which individual participants were included in clusters for the purposes of the trial (such as complete                                                                                                    | p. 6 |

|                                                             |     |                                                                                                                                                |                                                                                                                                                                     |                  |
|-------------------------------------------------------------|-----|------------------------------------------------------------------------------------------------------------------------------------------------|---------------------------------------------------------------------------------------------------------------------------------------------------------------------|------------------|
|                                                             |     |                                                                                                                                                | enumeration, random sampling)                                                                                                                                       |                  |
|                                                             | 10c |                                                                                                                                                | From whom consent was sought (representatives of the cluster, or individual cluster members, or both), and whether consent was sought before or after randomisation | p. 8             |
| <b>Blinding</b>                                             | 11a | If done, who was blinded after assignment to interventions (for example, participants, care providers, those assessing outcomes) and how       |                                                                                                                                                                     | n.a.             |
|                                                             | 11b | If relevant, description of the similarity of interventions                                                                                    |                                                                                                                                                                     | n.a.             |
| <b>Statistical methods</b>                                  | 12a | Statistical methods used to compare groups for primary and secondary outcomes                                                                  | How clustering was taken into account                                                                                                                               | p. 9             |
|                                                             | 12b | Methods for additional analyses, such as subgroup analyses and adjusted analyses                                                               |                                                                                                                                                                     | p. 9             |
| <b>Results</b>                                              |     |                                                                                                                                                |                                                                                                                                                                     |                  |
| <b>Participant flow (a diagram is strongly recommended)</b> | 13a | For each group, the numbers of participants who were randomly assigned, received intended treatment, and were analysed for the primary outcome | For each group, the numbers of clusters that were randomly assigned, received intended treatment, and were analysed for the primary outcome                         | p. 6<br>Figure 1 |
|                                                             | 13b | For each group, losses and exclusions after randomisation, together with reasons                                                               | For each group, losses and exclusions for both clusters and individual cluster members                                                                              | p.6              |
| <b>Recruitment</b>                                          | 14a | Dates defining the periods of recruitment and follow-up                                                                                        |                                                                                                                                                                     | p. 6             |
|                                                             | 14b | Why the trial ended or was stopped                                                                                                             |                                                                                                                                                                     | n.a.             |
| <b>Baseline data</b>                                        | 15  | A table showing baseline demographic and clinical                                                                                              | Baseline characteristics for the individual and cluster levels as                                                                                                   |                  |

|                                |     |                                                                                                                                                   |                                                                                                                                            |        |
|--------------------------------|-----|---------------------------------------------------------------------------------------------------------------------------------------------------|--------------------------------------------------------------------------------------------------------------------------------------------|--------|
|                                |     | characteristics for each group                                                                                                                    | applicable for each group                                                                                                                  |        |
| <b>Numbers analysed</b>        | 16  | For each group, number of participants (denominator) included in each analysis and whether the analysis was by original assigned groups           | For each group, number of clusters included in each analysis                                                                               | p. 6   |
| <b>Outcomes and estimation</b> | 17a | For each primary and secondary outcome, results for each group, and the estimated effect size and its precision (such as 95% confidence interval) | Results at the individual or cluster level as applicable and a coefficient of intracluster correlation (ICC or k) for each primary outcome | p. 9-  |
|                                | 17b | For binary outcomes, presentation of both absolute and relative effect sizes is recommended                                                       |                                                                                                                                            | p. 9-  |
| <b>Ancillary analyses</b>      | 18  | Results of any other analyses performed, including subgroup analyses and adjusted analyses, distinguishing pre-specified from exploratory         |                                                                                                                                            | p. 9-  |
| <b>Harms</b>                   | 19  | All important harms or unintended effects in each group (for specific guidance see CONSORT for harms)                                             |                                                                                                                                            |        |
| <b>Discussion</b>              |     |                                                                                                                                                   |                                                                                                                                            |        |
| <b>Limitations</b>             | 20  | Trial limitations, addressing sources of potential bias, imprecision, and, if relevant, multiplicity of analyses                                  |                                                                                                                                            | p. 13  |
| <b>Generalisability</b>        | 21  | Generalisability (external validity, applicability) of the trial findings                                                                         | Generalisability to clusters and/or individual participants (as relevant)                                                                  | p. 13  |
| <b>Interpretation</b>          | 22  | Interpretation consistent with results, balancing benefits and harms, and considering other relevant evidence                                     |                                                                                                                                            | p. 12- |
| <b>Other information</b>       |     |                                                                                                                                                   |                                                                                                                                            |        |
| <b>Registration</b>            | 23  | Registration number and                                                                                                                           |                                                                                                                                            | p. 2   |

|                 |    |                                                                                 |       |
|-----------------|----|---------------------------------------------------------------------------------|-------|
|                 |    | name of trial registry                                                          |       |
| <b>Protocol</b> | 24 | Where the full trial protocol can be accessed, if available                     | p. 6  |
| <b>Funding</b>  | 25 | Sources of funding and other support (such as supply of drugs), role of funders | p. 15 |

\* Note: page numbers optional depending on journal requirements

For peer review only
